# Supplementary material for: Non-ceruloplasmin copper and urinary copper in clinically stable Wilson disease: Alignment with recommended targets
Source: PubMed Central journal article supplement — JHEP Rep. 2024 May 6;6(8):101115. doi: 10.1016/j.jhepr.2024.101115 (PMC11321293; doi:10.1016/j.jhepr.2024.101115), 2024-05-06
Supplement: mmc1.pdf [file mmc1.pdf]

**Non-ceruloplasmin copper and urinary copper in clinically stable  
Wilson disease: Alignment with recommended targets and values in  
healthy persons**

**Peter Ott, Thomas Sandahl**, Aftab Ala, David Cassiman, Eduardo Couchonnal-  
Bedoya, Rubens Gisbert Cury, Anna Czlonkowska, Gerald Denk, Renata D’Inca,  
Francisco de Assis Aquino Gondim, Joanna Moore, Aurelia Poujois, Carlos  
Alexandre Twardowschy, Karl Heinz Weiss, Massimo Zuin, C. Omar F Kamlin,  
Michael L Schilsky

|                            |   |
|----------------------------|---|
| Table of contents          |   |
| List of investigators..... | 2 |
| Table S1.....              | 4 |
| Fig. S1.....               | 5 |
| Fig. S2.....               | 6 |
| Fig. S3.....               | 7 |

## List of investigators

Dr. Peter Ott, Dept. of Hepatology and Gastroenterology, Aarhus University Hospital, 8200 Aarhus C, Denmark. E: [peter.ott@clin.au.dk](mailto:peter.ott@clin.au.dk)

Dr. Thomas Sandahl Dept. of Hepatology and Gastroenterology, Aarhus University Hospital, 8200 Aarhus C, Denmark. [thomsand@rm.dk](mailto:thomsand@rm.dk)

Dr. Aftab Ala. Institute of Liver Studies King's College Hospital NHS Foundation Trust, London, UK. E: [aftab.ala1@nhs.net](mailto:aftab.ala1@nhs.net)

Dr. David Cassiman. University Hospitals, Leuven - Department of Gastroenterology-Hepatology and Dept. of Chronic Diseases and Metabolism, Herestraat 49, 3000 Leuven, Belgium. E: [david.cassiman@kuleuven.be](mailto:david.cassiman@kuleuven.be)

Dr. Eduardo Couchonnal-Bedoya, Hospices Civils de Lyon- Hôpital Femme Mère Enfant - Hépatologie, Gastroentérologie et Nutrition pédiatrique, Centre de Référence de la maladie de Wilson, 59 boulevard Pinel, 69677 BRON, France. E : [eduardo.couchonnal-bedoya@chu-lyon.fr](mailto:eduardo.couchonnal-bedoya@chu-lyon.fr)

Dr. Rubens Gisbert Cury, Hospital das Clínicas da Faculdade de Medicina da Universidade de São Paulo, R. Dr. Eneas de Carvalho Aguiar, 255- Cerqueira César, Sao Paulo, Brazil. E: [rubens.cury@hc.fm.usp.br](mailto:rubens.cury@hc.fm.usp.br)

Dr. Joanna Moore. Leeds Liver Unit, St James's University Hospital, Leeds, UK. [joanna.moore@nhs.net](mailto:joanna.moore@nhs.net)

Dr. Anna Czlonkowska, 2<sup>nd</sup> Department of Neurology, Institute of Psychiatry and Neurology, 02 957 Warsaw, Poland, [czlonkow@ipin.edu.pl](mailto:czlonkow@ipin.edu.pl) ORCID 0000 0002 1956 1866

Dr. Gerald Denk, Medizinische Klinik und Poliklinik II/Transplantation Center, LMU Klinikum, LMU Munich, Germany; [gerald.denk@med.uni-muenchen.de](mailto:gerald.denk@med.uni-muenchen.de)

Dr. Renata D’Inca, Department of Surgical, Oncological and Gastroenterological Sciences, University of Padova, Padova, Italy. E: [dinca@unipd.it](mailto:dinca@unipd.it)

Dr. Francisco de Assis Aquino Gondim , Nucleo de Pesquisa e Desenvolvimento de Medicamentos – Universidade Federal do Ceará - Rodolfo Teófilo R. Coronel Nunes de Melo 1000, Fortaleza CE60430-275, Brazil. E: [gondimfranc@gmail.com](mailto:gondimfranc@gmail.com)

Dr. Joanna Moore, Leeds Teaching Hospitals NHS Trust Merville Building, LS9 7TF Leeds, UK. E: [joanna.moore@nhs.net](mailto:joanna.moore@nhs.net)

Dr Aurelia Poujois. Département de Neurologie, Centre de Reference de la Maladie de Wilson, Hopital Fondation Adolphe de Rothschild, Paris, France. E: [apoujois@for.paris](mailto:apoujois@for.paris)

Dr. Carlos Alexandre Twardowschy, Hospital Nossa Senhora das Graças (HNSG), R. Alcides Munhoz, 433, Curitiba-PR 80810, Brazil. E: [carlos.a.tw@gmail.com](mailto:carlos.a.tw@gmail.com)

Dr. Karl Heinz Weiss. , Salem Medicinal Center, Dept. Of Internal Medicine, Zeppelinstr. 11-33, Heidelberg 69121, Germany. E: [KarlHeinz.Weiss@stadtmission-hd.de](mailto:KarlHeinz.Weiss@stadtmission-hd.de)

Dr. Massimo Zuin, U.O. Medicina Generale VI Epatologia e Gastroenterologia Medica ASST Santi Paolo e Carlo. Via A. Di Rudinì, 8, Milano, Italy. E: [massimo.zuin@gmail.com](mailto:massimo.zuin@gmail.com)

Dr. C.Omar F Kamlin, Orphalan, 226 Boulevard Voltaire, Paris, France 75011. E: [omar.kamlin@orphalan.com](mailto:omar.kamlin@orphalan.com)

Dr. Michael L Schilsky, Departments of Medicine and Surgery, Sections of Digestive Diseases and Transplant and Immunology, Yale School of Medicine, 333 Cedar St, LMP 1080, New Haven - Connecticut 06510, USA. E: [michael.schilsky@yale.edu](mailto:michael.schilsky@yale.edu)

**Table S1.**

Distribution Total Cu and NCC-Sp in healthy humans according to gender and ethnicity.

|                  | Total Plasma Copper (µg/L) |        |                     |          | NCC-Sp (µg/L) |        |                     |                   |
|------------------|----------------------------|--------|---------------------|----------|---------------|--------|---------------------|-------------------|
|                  | N                          | Median | 0.025-0.975 % range | <i>p</i> | N             | Median | 0.025-0.975 % range | <i>p</i>          |
| <b>All</b>       | 75                         | 1030   | 717-1731            |          | 75            | 86     | 46-213              |                   |
| <b>Gender</b>    |                            |        |                     |          |               |        |                     |                   |
| Female           | 37                         | 1030   | 730-1861            | 0.55*)   | 37            | 63     | 45-209              | 0.0007*)          |
| Male             | 38                         | 1030   | 718-1655            |          | 38            | 109    | 63-211              |                   |
| <b>Ethnicity</b> |                            |        |                     |          |               |        |                     |                   |
| Black            | 19                         | 1170   | 791-1911            | 0.002**) | 19            | 80     | 54-203              | <10 <sup>-5</sup> |
| Caucasian        | 23                         | 941    | 692-1301            |          | 23            | 178    | 117-212             |                   |
| Hispanic         | 31                         | 1030   | 772-1605            |          | 31            | 63     | 44-164              |                   |
| Other            | 2                          | 1040   | 930-1150            |          | 2             | 192    | 208-209             |                   |

\*) Mann-Whitney's test;

\*\*) Kruskal-Wallis' test ("Other" not included because of less than 5 samples)

Fig. S1.

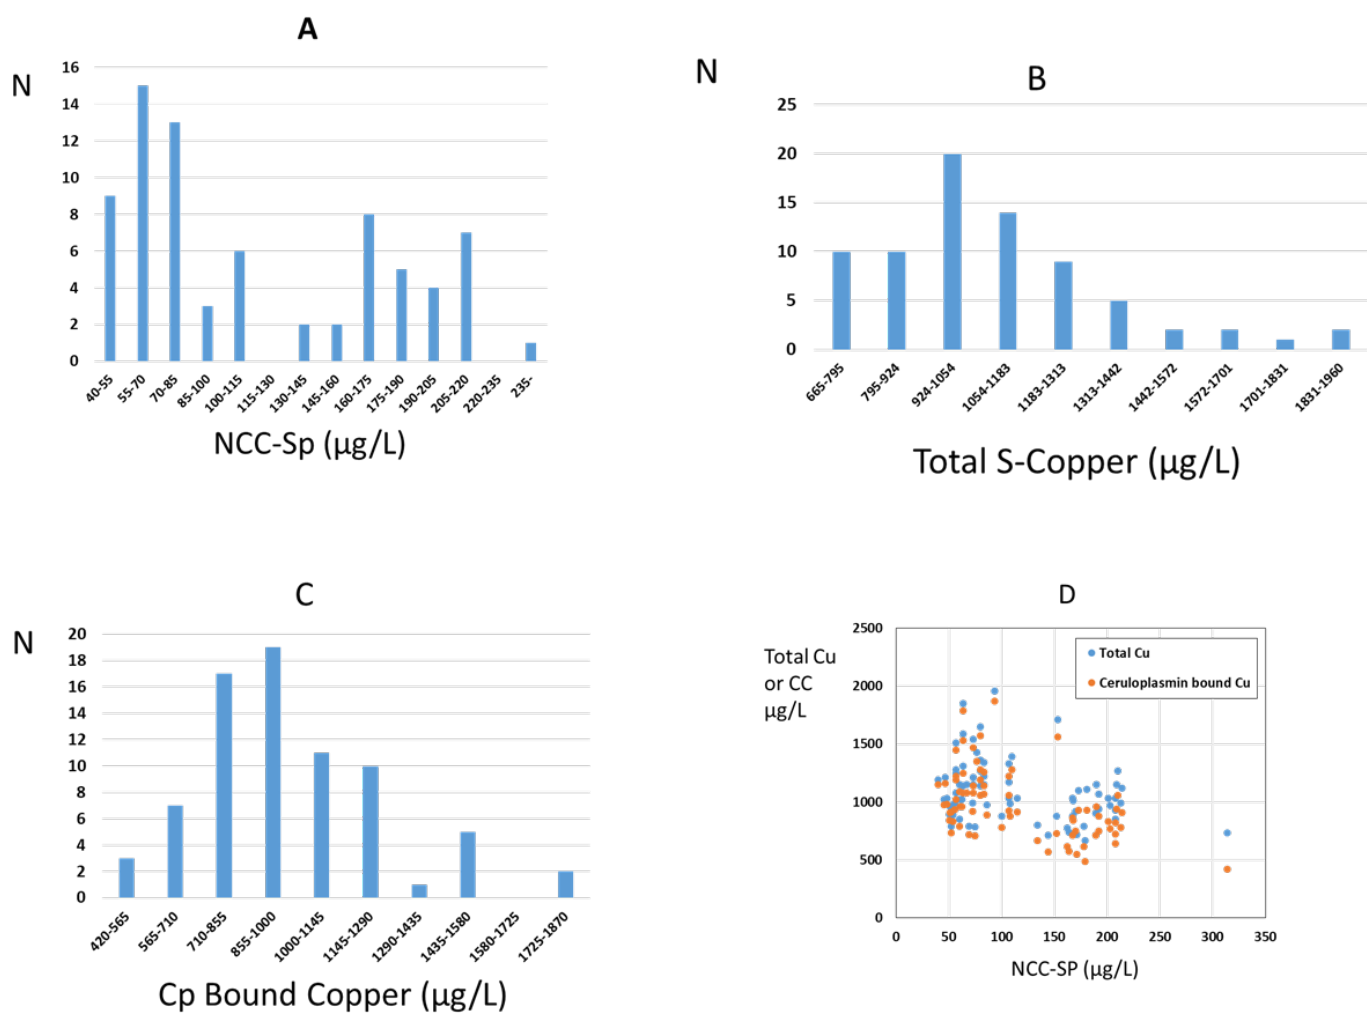

Fig. S1. Distribution of NCC-Sp, Total S-Cu, and Cp Bound Cu in 75 healthy volunteers.

Fig. S2.

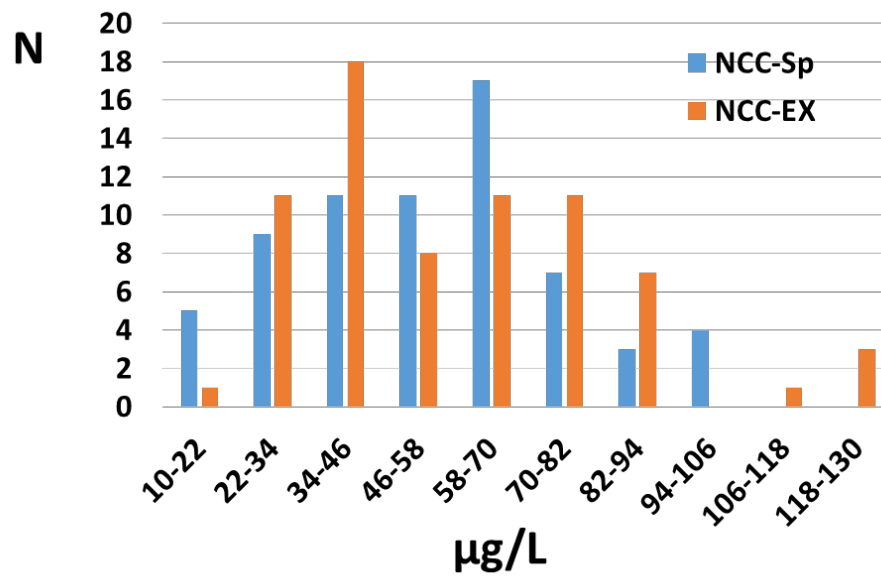

**Fig. S2.** Distribution of NCC-Sp in 69 patients and NCC-Ex in 71 WD patients at their first visit in the Chelate study (27).

Fig. S3.

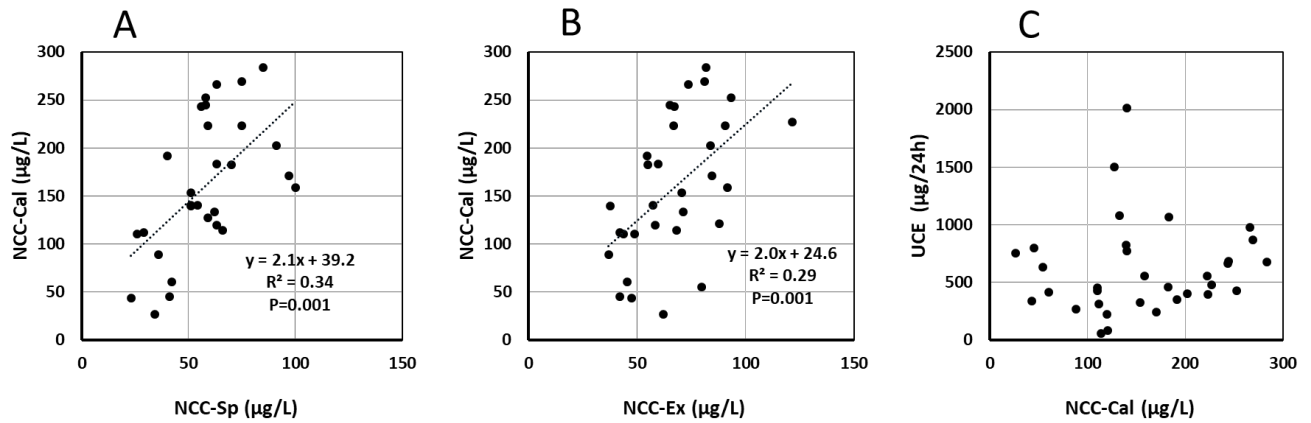

**Fig. S3.** Relation of NCC-Cal to NCC-Sp, NCC-Ex and UCE. NCC-Cal was calculated as Total Serum Copper (µg/L) – 3.14·Ceruloplasmin (µg/L). Values could only be calculated in 27, since only 33 patients had ceruloplasmin above the lower limit of quantification (LLOQ) of 52 mg/L and total copper not available in 6 of these. There was no covariation between NCC-Cal and UCE. Both NCC-Sp and NCC-Ex were positively correlated to NCC-Cal ( $p=0.001$  in both cases), but NCC-Cal was clearly above the line of identity. NCC-Cal did not correlate with UCE.
