# Supplementary material for: Non-ceruloplasmin copper and urinary copper in clinically stable Wilson disease: Alignment with recommended targets
Source: PubMed Central journal article supplement — JHEP Rep. 2024 May 6;6(8):101115. doi: 10.1016/j.jhepr.2024.101115 (PMC11321293; doi:10.1016/j.jhepr.2024.101115), 2024-05-06
Supplement: mmc3.pdf [file mmc3.pdf]

### ICMJE DISCLOSURE FORM

**Date:** 3/11/2024

**Your Name:** Peter Ott

**Manuscript Title:** Non-ceruloplasmin copper and urinary copper in clinically stable Wilson Disease: Alignment with recommended targets and values in healthy persons

**Manuscript Number (if known):** JHEPR-D-23-01117

In the interest of transparency, we ask you to disclose all relationships/activities/interests listed below that are related to the content of your manuscript. "Related" means any relation with for-profit or not-for-profit third parties whose interests may be affected by the content of the manuscript. Disclosure represents a commitment to transparency and does not necessarily indicate a bias. If you are in doubt about whether to list a relationship/activity/interest, it is preferable that you do so.

The author's relationships/activities/interests should be defined broadly. For example, if your manuscript pertains to the epidemiology of hypertension, you should declare all relationships with manufacturers of antihypertensive medication, even if that medication is not mentioned in the manuscript.

In item #1 below, report all support for the work reported in this manuscript without time limit. For all other items, the time frame for disclosure is the past 36 months.

|                                                                 | Name all entities with whom you have this relationship or indicate none (add rows as needed)                                                                                   | Specifications/Comments (e.g., if payments were made to you or to your institution)                                                                                                                                                                                                                                                                                                                                                                                                                                      |                                                                 |                                                                                                     |          |                   |                                           |  |
|-----------------------------------------------------------------|--------------------------------------------------------------------------------------------------------------------------------------------------------------------------------|--------------------------------------------------------------------------------------------------------------------------------------------------------------------------------------------------------------------------------------------------------------------------------------------------------------------------------------------------------------------------------------------------------------------------------------------------------------------------------------------------------------------------|-----------------------------------------------------------------|-----------------------------------------------------------------------------------------------------|----------|-------------------|-------------------------------------------|--|
| Time frame: Since the initial planning of the work              |                                                                                                                                                                                |                                                                                                                                                                                                                                                                                                                                                                                                                                                                                                                          |                                                                 |                                                                                                     |          |                   |                                           |  |
| <b>1</b>                                                        | All support for the present manuscript (e.g., funding, provision of study materials, medical writing, article processing charges, etc.)<br><b>No time limit for this item.</b> | <input type="checkbox"/> None<br><br><table border="1" style="width: 100%; border-collapse: collapse;"> <tr> <td style="width: 60%;">The Memorial Foundation of Manufacturer Vilhelm Pedersen &amp; Wife</td> <td>Unconditional research grant to Dept of Hepatology and Gastroenterology, Aarhus University Hospital</td> </tr> <tr> <td>Orphanal</td> <td>Provided the data</td> </tr> <tr> <td colspan="2" style="text-align: right; font-size: small;">Click the tab key to add additional rows.</td> </tr> </table> | The Memorial Foundation of Manufacturer Vilhelm Pedersen & Wife | Unconditional research grant to Dept of Hepatology and Gastroenterology, Aarhus University Hospital | Orphanal | Provided the data | Click the tab key to add additional rows. |  |
| The Memorial Foundation of Manufacturer Vilhelm Pedersen & Wife | Unconditional research grant to Dept of Hepatology and Gastroenterology, Aarhus University Hospital                                                                            |                                                                                                                                                                                                                                                                                                                                                                                                                                                                                                                          |                                                                 |                                                                                                     |          |                   |                                           |  |
| Orphanal                                                        | Provided the data                                                                                                                                                              |                                                                                                                                                                                                                                                                                                                                                                                                                                                                                                                          |                                                                 |                                                                                                     |          |                   |                                           |  |
| Click the tab key to add additional rows.                       |                                                                                                                                                                                |                                                                                                                                                                                                                                                                                                                                                                                                                                                                                                                          |                                                                 |                                                                                                     |          |                   |                                           |  |
| Time frame: past 36 months                                      |                                                                                                                                                                                |                                                                                                                                                                                                                                                                                                                                                                                                                                                                                                                          |                                                                 |                                                                                                     |          |                   |                                           |  |
| <b>2</b>                                                        | Grants or contracts from any entity (if not indicated in item #1 above).                                                                                                       | <input type="checkbox"/> None<br><br><table border="1" style="width: 100%; border-collapse: collapse;"> <tr> <td style="width: 60%;">Orphanal</td> <td>Unconditional research grant to Dept of Hepatology and Gastroenterology, Aarhus University Hospital</td> </tr> <tr> <td> </td> <td> </td> </tr> <tr> <td> </td> <td> </td> </tr> </table>                                                                                                                                                                         | Orphanal                                                        | Unconditional research grant to Dept of Hepatology and Gastroenterology, Aarhus University Hospital |          |                   |                                           |  |
| Orphanal                                                        | Unconditional research grant to Dept of Hepatology and Gastroenterology, Aarhus University Hospital                                                                            |                                                                                                                                                                                                                                                                                                                                                                                                                                                                                                                          |                                                                 |                                                                                                     |          |                   |                                           |  |
|                                                                 |                                                                                                                                                                                |                                                                                                                                                                                                                                                                                                                                                                                                                                                                                                                          |                                                                 |                                                                                                     |          |                   |                                           |  |
|                                                                 |                                                                                                                                                                                |                                                                                                                                                                                                                                                                                                                                                                                                                                                                                                                          |                                                                 |                                                                                                     |          |                   |                                           |  |

|                                                                 |                                                                                                              | Name all entities with whom you have this relationship or indicate none (add rows as needed)                                                                                                                                                                                                    | Specifications/Comments (e.g., if payments were made to you or to your institution) |                       |       |                     |            |                     |  |
|-----------------------------------------------------------------|--------------------------------------------------------------------------------------------------------------|-------------------------------------------------------------------------------------------------------------------------------------------------------------------------------------------------------------------------------------------------------------------------------------------------|-------------------------------------------------------------------------------------|-----------------------|-------|---------------------|------------|---------------------|--|
| 3                                                               | Royalties or licenses                                                                                        | <input type="checkbox"/> None<br><table border="1" style="width: 100%; border-collapse: collapse;"> <tr><td> </td><td> </td></tr> <tr><td> </td><td> </td></tr> <tr><td> </td><td> </td></tr> </table>                                                                                          |                                                                                     |                       |       |                     |            |                     |  |
|                                                                 |                                                                                                              |                                                                                                                                                                                                                                                                                                 |                                                                                     |                       |       |                     |            |                     |  |
|                                                                 |                                                                                                              |                                                                                                                                                                                                                                                                                                 |                                                                                     |                       |       |                     |            |                     |  |
|                                                                 |                                                                                                              |                                                                                                                                                                                                                                                                                                 |                                                                                     |                       |       |                     |            |                     |  |
| 4                                                               | Consulting fees                                                                                              | <input checked="" type="checkbox"/> None<br><table border="1" style="width: 100%; border-collapse: collapse;"> <tr> <td>Orphanan</td> <td>January 2023</td> </tr> <tr><td> </td><td> </td></tr> <tr><td> </td><td> </td></tr> </table>                                                          | Orphanan                                                                            | January 2023          |       |                     |            |                     |  |
| Orphanan                                                        | January 2023                                                                                                 |                                                                                                                                                                                                                                                                                                 |                                                                                     |                       |       |                     |            |                     |  |
|                                                                 |                                                                                                              |                                                                                                                                                                                                                                                                                                 |                                                                                     |                       |       |                     |            |                     |  |
|                                                                 |                                                                                                              |                                                                                                                                                                                                                                                                                                 |                                                                                     |                       |       |                     |            |                     |  |
| 5                                                               | Payment or honoraria for lectures, presentations, speakers bureaus, manuscript writing or educational events | <input checked="" type="checkbox"/> None<br><table border="1" style="width: 100%; border-collapse: collapse;"> <tr><td> </td><td> </td></tr> <tr><td> </td><td> </td></tr> <tr><td> </td><td> </td></tr> </table>                                                                               |                                                                                     |                       |       |                     |            |                     |  |
|                                                                 |                                                                                                              |                                                                                                                                                                                                                                                                                                 |                                                                                     |                       |       |                     |            |                     |  |
|                                                                 |                                                                                                              |                                                                                                                                                                                                                                                                                                 |                                                                                     |                       |       |                     |            |                     |  |
|                                                                 |                                                                                                              |                                                                                                                                                                                                                                                                                                 |                                                                                     |                       |       |                     |            |                     |  |
| 6                                                               | Payment for expert testimony                                                                                 | <input checked="" type="checkbox"/> None<br><table border="1" style="width: 100%; border-collapse: collapse;"> <tr><td> </td><td> </td></tr> <tr><td> </td><td> </td></tr> <tr><td> </td><td> </td></tr> </table>                                                                               |                                                                                     |                       |       |                     |            |                     |  |
|                                                                 |                                                                                                              |                                                                                                                                                                                                                                                                                                 |                                                                                     |                       |       |                     |            |                     |  |
|                                                                 |                                                                                                              |                                                                                                                                                                                                                                                                                                 |                                                                                     |                       |       |                     |            |                     |  |
|                                                                 |                                                                                                              |                                                                                                                                                                                                                                                                                                 |                                                                                     |                       |       |                     |            |                     |  |
| 7                                                               | Support for attending meetings and/or travel                                                                 | <input type="checkbox"/> None<br><table border="1" style="width: 100%; border-collapse: collapse;"> <tr> <td>The Memorial Foundation of Manufacturer Vilhelm Pedersen &amp; Wife</td> <td>EASL 2023, AASLD 2023</td> </tr> <tr><td> </td><td> </td></tr> <tr><td> </td><td> </td></tr> </table> | The Memorial Foundation of Manufacturer Vilhelm Pedersen & Wife                     | EASL 2023, AASLD 2023 |       |                     |            |                     |  |
| The Memorial Foundation of Manufacturer Vilhelm Pedersen & Wife | EASL 2023, AASLD 2023                                                                                        |                                                                                                                                                                                                                                                                                                 |                                                                                     |                       |       |                     |            |                     |  |
|                                                                 |                                                                                                              |                                                                                                                                                                                                                                                                                                 |                                                                                     |                       |       |                     |            |                     |  |
|                                                                 |                                                                                                              |                                                                                                                                                                                                                                                                                                 |                                                                                     |                       |       |                     |            |                     |  |
| 8                                                               | Patents planned, issued or pending                                                                           | <input checked="" type="checkbox"/> None<br><table border="1" style="width: 100%; border-collapse: collapse;"> <tr><td> </td><td> </td></tr> <tr><td> </td><td> </td></tr> <tr><td> </td><td> </td></tr> </table>                                                                               |                                                                                     |                       |       |                     |            |                     |  |
|                                                                 |                                                                                                              |                                                                                                                                                                                                                                                                                                 |                                                                                     |                       |       |                     |            |                     |  |
|                                                                 |                                                                                                              |                                                                                                                                                                                                                                                                                                 |                                                                                     |                       |       |                     |            |                     |  |
|                                                                 |                                                                                                              |                                                                                                                                                                                                                                                                                                 |                                                                                     |                       |       |                     |            |                     |  |
| 9                                                               | Participation on a Data Safety Monitoring Board or Advisory Board                                            | <input type="checkbox"/> None<br><table border="1" style="width: 100%; border-collapse: collapse;"> <tr> <td>MAXBRAIN</td> <td>Safety Surveillance</td> </tr> <tr> <td>Vivex</td> <td>Safety Surveillance</td> </tr> <tr> <td>Ultragenyx</td> <td>Safety Surveillance</td> </tr> </table>       | MAXBRAIN                                                                            | Safety Surveillance   | Vivex | Safety Surveillance | Ultragenyx | Safety Surveillance |  |
| MAXBRAIN                                                        | Safety Surveillance                                                                                          |                                                                                                                                                                                                                                                                                                 |                                                                                     |                       |       |                     |            |                     |  |
| Vivex                                                           | Safety Surveillance                                                                                          |                                                                                                                                                                                                                                                                                                 |                                                                                     |                       |       |                     |            |                     |  |
| Ultragenyx                                                      | Safety Surveillance                                                                                          |                                                                                                                                                                                                                                                                                                 |                                                                                     |                       |       |                     |            |                     |  |

|           |                                                                                                   | Name all entities with whom you have this relationship or indicate none (add rows as needed)                                                                                                                                                                                                                         | Specifications/Comments (e.g., if payments were made to you or to your institution) |  |  |  |  |  |  |
|-----------|---------------------------------------------------------------------------------------------------|----------------------------------------------------------------------------------------------------------------------------------------------------------------------------------------------------------------------------------------------------------------------------------------------------------------------|-------------------------------------------------------------------------------------|--|--|--|--|--|--|
| <b>10</b> | Leadership or fiduciary role in other board, society, committee or advocacy group, paid or unpaid | <input checked="" type="checkbox"/> <b>None</b><br><table border="1" style="width: 100%; border-collapse: collapse;"> <tr><td style="width: 50%; height: 20px;"></td><td style="width: 50%;"></td></tr> <tr><td style="height: 20px;"></td><td></td></tr> <tr><td style="height: 20px;"></td><td></td></tr> </table> |                                                                                     |  |  |  |  |  |  |
|           |                                                                                                   |                                                                                                                                                                                                                                                                                                                      |                                                                                     |  |  |  |  |  |  |
|           |                                                                                                   |                                                                                                                                                                                                                                                                                                                      |                                                                                     |  |  |  |  |  |  |
|           |                                                                                                   |                                                                                                                                                                                                                                                                                                                      |                                                                                     |  |  |  |  |  |  |
| <b>11</b> | Stock or stock options                                                                            | <input checked="" type="checkbox"/> <b>None</b><br><table border="1" style="width: 100%; border-collapse: collapse;"> <tr><td style="width: 50%; height: 20px;"></td><td style="width: 50%;"></td></tr> <tr><td style="height: 20px;"></td><td></td></tr> <tr><td style="height: 20px;"></td><td></td></tr> </table> |                                                                                     |  |  |  |  |  |  |
|           |                                                                                                   |                                                                                                                                                                                                                                                                                                                      |                                                                                     |  |  |  |  |  |  |
|           |                                                                                                   |                                                                                                                                                                                                                                                                                                                      |                                                                                     |  |  |  |  |  |  |
|           |                                                                                                   |                                                                                                                                                                                                                                                                                                                      |                                                                                     |  |  |  |  |  |  |
| <b>12</b> | Receipt of equipment, materials, drugs, medical writing, gifts or other services                  | <input checked="" type="checkbox"/> <b>None</b><br><table border="1" style="width: 100%; border-collapse: collapse;"> <tr><td style="width: 50%; height: 20px;"></td><td style="width: 50%;"></td></tr> <tr><td style="height: 20px;"></td><td></td></tr> <tr><td style="height: 20px;"></td><td></td></tr> </table> |                                                                                     |  |  |  |  |  |  |
|           |                                                                                                   |                                                                                                                                                                                                                                                                                                                      |                                                                                     |  |  |  |  |  |  |
|           |                                                                                                   |                                                                                                                                                                                                                                                                                                                      |                                                                                     |  |  |  |  |  |  |
|           |                                                                                                   |                                                                                                                                                                                                                                                                                                                      |                                                                                     |  |  |  |  |  |  |
| <b>13</b> | Other financial or non-financial interests                                                        | <input checked="" type="checkbox"/> <b>None</b><br><table border="1" style="width: 100%; border-collapse: collapse;"> <tr><td style="width: 50%; height: 20px;"></td><td style="width: 50%;"></td></tr> <tr><td style="height: 20px;"></td><td></td></tr> <tr><td style="height: 20px;"></td><td></td></tr> </table> |                                                                                     |  |  |  |  |  |  |
|           |                                                                                                   |                                                                                                                                                                                                                                                                                                                      |                                                                                     |  |  |  |  |  |  |
|           |                                                                                                   |                                                                                                                                                                                                                                                                                                                      |                                                                                     |  |  |  |  |  |  |
|           |                                                                                                   |                                                                                                                                                                                                                                                                                                                      |                                                                                     |  |  |  |  |  |  |

**Please place an "X" next to the following statement to indicate your agreement:**

I certify that I have answered every question and have not altered the wording of any of the questions on this form.

## ICMJE DISCLOSURE FORM

**Date:** 3/19/2024

**Your Name:** Thomas Damgaard Sandahl

**Manuscript Title:** Non-ceruloplasmin copper and urinary copper in clinically stable Wilson Disease: Alignment with recommended targets and values in healthy persons

**Manuscript Number (if known):** JHEPR-D-23-01117

In the interest of transparency, we ask you to disclose all relationships/activities/interests listed below that are related to the content of your manuscript. "Related" means any relation with for-profit or not-for-profit third parties whose interests may be affected by the content of the manuscript. Disclosure represents a commitment to transparency and does not necessarily indicate a bias. If you are in doubt about whether to list a relationship/activity/interest, it is preferable that you do so.

The author's relationships/activities/interests should be defined broadly. For example, if your manuscript pertains to the epidemiology of hypertension, you should declare all relationships with manufacturers of antihypertensive medication, even if that medication is not mentioned in the manuscript.

In item #1 below, report all support for the work reported in this manuscript without time limit. For all other items, the time frame for disclosure is the past 36 months.

|                                                    | Name all entities with whom you have this relationship or indicate none (add rows as needed)                                                                                   | Specifications/Comments (e.g., if payments were made to you or to your institution)                                                                                                                                                                                                                                                                                               |  |  |  |  |  |  |
|----------------------------------------------------|--------------------------------------------------------------------------------------------------------------------------------------------------------------------------------|-----------------------------------------------------------------------------------------------------------------------------------------------------------------------------------------------------------------------------------------------------------------------------------------------------------------------------------------------------------------------------------|--|--|--|--|--|--|
| Time frame: Since the initial planning of the work |                                                                                                                                                                                |                                                                                                                                                                                                                                                                                                                                                                                   |  |  |  |  |  |  |
| <b>1</b>                                           | All support for the present manuscript (e.g., funding, provision of study materials, medical writing, article processing charges, etc.)<br><b>No time limit for this item.</b> | <input checked="" type="checkbox"/> <b>None</b><br><table border="1" style="width: 100%; height: 40px; margin-top: 5px;"> <tr><td style="width: 60%;"></td><td style="width: 40%;"></td></tr> <tr><td></td><td></td></tr> <tr><td></td><td></td></tr> </table> <div style="text-align: right; font-size: small; margin-top: 5px;">Click the tab key to add additional rows.</div> |  |  |  |  |  |  |
|                                                    |                                                                                                                                                                                |                                                                                                                                                                                                                                                                                                                                                                                   |  |  |  |  |  |  |
|                                                    |                                                                                                                                                                                |                                                                                                                                                                                                                                                                                                                                                                                   |  |  |  |  |  |  |
|                                                    |                                                                                                                                                                                |                                                                                                                                                                                                                                                                                                                                                                                   |  |  |  |  |  |  |
| Time frame: past 36 months                         |                                                                                                                                                                                |                                                                                                                                                                                                                                                                                                                                                                                   |  |  |  |  |  |  |
| <b>2</b>                                           | Grants or contracts from any entity (if not indicated in item #1 above).                                                                                                       | <input checked="" type="checkbox"/> <b>None</b><br><table border="1" style="width: 100%; height: 40px; margin-top: 5px;"> <tr><td style="width: 60%;"></td><td style="width: 40%;"></td></tr> <tr><td></td><td></td></tr> <tr><td></td><td></td></tr> </table>                                                                                                                    |  |  |  |  |  |  |
|                                                    |                                                                                                                                                                                |                                                                                                                                                                                                                                                                                                                                                                                   |  |  |  |  |  |  |
|                                                    |                                                                                                                                                                                |                                                                                                                                                                                                                                                                                                                                                                                   |  |  |  |  |  |  |
|                                                    |                                                                                                                                                                                |                                                                                                                                                                                                                                                                                                                                                                                   |  |  |  |  |  |  |
| <b>3</b>                                           | Royalties or licenses                                                                                                                                                          | <input checked="" type="checkbox"/> <b>None</b><br><table border="1" style="width: 100%; height: 40px; margin-top: 5px;"> <tr><td style="width: 60%;"></td><td style="width: 40%;"></td></tr> <tr><td></td><td></td></tr> <tr><td></td><td></td></tr> </table>                                                                                                                    |  |  |  |  |  |  |
|                                                    |                                                                                                                                                                                |                                                                                                                                                                                                                                                                                                                                                                                   |  |  |  |  |  |  |
|                                                    |                                                                                                                                                                                |                                                                                                                                                                                                                                                                                                                                                                                   |  |  |  |  |  |  |
|                                                    |                                                                                                                                                                                |                                                                                                                                                                                                                                                                                                                                                                                   |  |  |  |  |  |  |

|                          |                                                                                                              | Name all entities with whom you have this relationship or indicate none (add rows as needed)                                                                                             | Specifications/Comments (e.g., if payments were made to you or to your institution) |  |  |  |  |  |  |
|--------------------------|--------------------------------------------------------------------------------------------------------------|------------------------------------------------------------------------------------------------------------------------------------------------------------------------------------------|-------------------------------------------------------------------------------------|--|--|--|--|--|--|
| 4                        | Consulting fees                                                                                              | <input type="checkbox"/> <b>None</b><br><table border="1"> <tr> <td>Arbormed, Vivet, Alexion</td> <td></td> </tr> <tr> <td></td> <td></td> </tr> <tr> <td></td> <td></td> </tr> </table> | Arbormed, Vivet, Alexion                                                            |  |  |  |  |  |  |
| Arbormed, Vivet, Alexion |                                                                                                              |                                                                                                                                                                                          |                                                                                     |  |  |  |  |  |  |
|                          |                                                                                                              |                                                                                                                                                                                          |                                                                                     |  |  |  |  |  |  |
|                          |                                                                                                              |                                                                                                                                                                                          |                                                                                     |  |  |  |  |  |  |
| 5                        | Payment or honoraria for lectures, presentations, speakers bureaus, manuscript writing or educational events | <input type="checkbox"/> <b>None</b><br><table border="1"> <tr> <td>Orphalan</td> <td></td> </tr> <tr> <td></td> <td></td> </tr> </table>                                                | Orphalan                                                                            |  |  |  |  |  |  |
| Orphalan                 |                                                                                                              |                                                                                                                                                                                          |                                                                                     |  |  |  |  |  |  |
|                          |                                                                                                              |                                                                                                                                                                                          |                                                                                     |  |  |  |  |  |  |
| 6                        | Payment for expert testimony                                                                                 | <input checked="" type="checkbox"/> <b>None</b><br><table border="1"> <tr> <td></td> <td></td> </tr> <tr> <td></td> <td></td> </tr> </table>                                             |                                                                                     |  |  |  |  |  |  |
|                          |                                                                                                              |                                                                                                                                                                                          |                                                                                     |  |  |  |  |  |  |
|                          |                                                                                                              |                                                                                                                                                                                          |                                                                                     |  |  |  |  |  |  |
| 7                        | Support for attending meetings and/or travel                                                                 | <input checked="" type="checkbox"/> <b>None</b><br><table border="1"> <tr> <td>Orphalan</td> <td></td> </tr> <tr> <td></td> <td></td> </tr> </table>                                     | Orphalan                                                                            |  |  |  |  |  |  |
| Orphalan                 |                                                                                                              |                                                                                                                                                                                          |                                                                                     |  |  |  |  |  |  |
|                          |                                                                                                              |                                                                                                                                                                                          |                                                                                     |  |  |  |  |  |  |
| 8                        | Patents planned, issued or pending                                                                           | <input checked="" type="checkbox"/> <b>None</b><br><table border="1"> <tr> <td></td> <td></td> </tr> <tr> <td></td> <td></td> </tr> </table>                                             |                                                                                     |  |  |  |  |  |  |
|                          |                                                                                                              |                                                                                                                                                                                          |                                                                                     |  |  |  |  |  |  |
|                          |                                                                                                              |                                                                                                                                                                                          |                                                                                     |  |  |  |  |  |  |
| 9                        | Participation on a Data Safety Monitoring Board or Advisory Board                                            | <input type="checkbox"/> <b>None</b><br><table border="1"> <tr> <td>Vivet</td> <td></td> </tr> <tr> <td></td> <td></td> </tr> </table>                                                   | Vivet                                                                               |  |  |  |  |  |  |
| Vivet                    |                                                                                                              |                                                                                                                                                                                          |                                                                                     |  |  |  |  |  |  |
|                          |                                                                                                              |                                                                                                                                                                                          |                                                                                     |  |  |  |  |  |  |
| 10                       | Leadership or fiduciary role in other board, society, committee or advocacy group, paid or unpaid            | <input checked="" type="checkbox"/> <b>None</b><br><table border="1"> <tr> <td></td> <td></td> </tr> <tr> <td></td> <td></td> </tr> </table>                                             |                                                                                     |  |  |  |  |  |  |
|                          |                                                                                                              |                                                                                                                                                                                          |                                                                                     |  |  |  |  |  |  |
|                          |                                                                                                              |                                                                                                                                                                                          |                                                                                     |  |  |  |  |  |  |

|           |                                                                                  | Name all entities with whom you have this relationship or indicate none (add rows as needed) | Specifications/Comments (e.g., if payments were made to you or to your institution) |
|-----------|----------------------------------------------------------------------------------|----------------------------------------------------------------------------------------------|-------------------------------------------------------------------------------------|
| <b>11</b> | Stock or stock options                                                           | <input checked="" type="checkbox"/> <b>None</b>                                              |                                                                                     |
|           |                                                                                  |                                                                                              |                                                                                     |
|           |                                                                                  |                                                                                              |                                                                                     |
| <b>12</b> | Receipt of equipment, materials, drugs, medical writing, gifts or other services | <input checked="" type="checkbox"/> <b>None</b>                                              |                                                                                     |
|           |                                                                                  |                                                                                              |                                                                                     |
|           |                                                                                  |                                                                                              |                                                                                     |
| <b>13</b> | Other financial or non-financial interests                                       | <input checked="" type="checkbox"/> <b>None</b>                                              |                                                                                     |
|           |                                                                                  |                                                                                              |                                                                                     |
|           |                                                                                  |                                                                                              |                                                                                     |

Please place an "X" next to the following statement to indicate your agreement:

I certify that I have answered every question and have not altered the wording of any of the questions on this form.

## ICMJE DISCLOSURE FORM

**Date:** 3/24/2024

**Your Name:** AFTAB ALA

**Manuscript Title:** Non-ceruloplasmin copper and urinary copper in clinically stable Wilson Disease: Alignment with recommended targets and values in healthy persons

**Manuscript Number (if known):** JHEPR-D-23-01117

In the interest of transparency, we ask you to disclose all relationships/activities/interests listed below that are related to the content of your manuscript. "Related" means any relation with for-profit or not-for-profit third parties whose interests may be affected by the content of the manuscript. Disclosure represents a commitment to transparency and does not necessarily indicate a bias. If you are in doubt about whether to list a relationship/activity/interest, it is preferable that you do so.

The author's relationships/activities/interests should be defined broadly. For example, if your manuscript pertains to the epidemiology of hypertension, you should declare all relationships with manufacturers of antihypertensive medication, even if that medication is not mentioned in the manuscript.

In item #1 below, report all support for the work reported in this manuscript without time limit. For all other items, the time frame for disclosure is the past 36 months.

|                                                    | Name all entities with whom you have this relationship or indicate none (add rows as needed)                                                                                   | Specifications/Comments (e.g., if payments were made to you or to your institution)                                                                                                                                                                                                                                                                                                                                           |                 |             |                                              |             |  |  |
|----------------------------------------------------|--------------------------------------------------------------------------------------------------------------------------------------------------------------------------------|-------------------------------------------------------------------------------------------------------------------------------------------------------------------------------------------------------------------------------------------------------------------------------------------------------------------------------------------------------------------------------------------------------------------------------|-----------------|-------------|----------------------------------------------|-------------|--|--|
| Time frame: Since the initial planning of the work |                                                                                                                                                                                |                                                                                                                                                                                                                                                                                                                                                                                                                               |                 |             |                                              |             |  |  |
| <b>1</b>                                           | All support for the present manuscript (e.g., funding, provision of study materials, medical writing, article processing charges, etc.)<br><b>No time limit for this item.</b> | <input checked="" type="checkbox"/> <b>None</b><br><table border="1" style="width: 100%; border-collapse: collapse; margin-top: 5px;"> <tr><td style="height: 15px;"> </td><td style="width: 100px;"> </td></tr> <tr><td style="height: 15px;"> </td><td> </td></tr> <tr><td style="height: 15px;"> </td><td> </td></tr> </table> <p style="font-size: small; margin-top: 5px;">Click the tab key to add additional rows.</p> |                 |             |                                              |             |  |  |
|                                                    |                                                                                                                                                                                |                                                                                                                                                                                                                                                                                                                                                                                                                               |                 |             |                                              |             |  |  |
|                                                    |                                                                                                                                                                                |                                                                                                                                                                                                                                                                                                                                                                                                                               |                 |             |                                              |             |  |  |
|                                                    |                                                                                                                                                                                |                                                                                                                                                                                                                                                                                                                                                                                                                               |                 |             |                                              |             |  |  |
| Time frame: past 36 months                         |                                                                                                                                                                                |                                                                                                                                                                                                                                                                                                                                                                                                                               |                 |             |                                              |             |  |  |
| <b>2</b>                                           | Grants or contracts from any entity (if not indicated in item #1 above).                                                                                                       | <input type="checkbox"/> <b>None</b><br><table border="1" style="width: 100%; border-collapse: collapse; margin-top: 5px;"> <tr> <td style="width: 60%;">UKRI, MRC, NIHR</td> <td>Institution</td> </tr> <tr> <td>Alexion, Orphalan, Univar, Vivet, Ultragenyx</td> <td>Institution</td> </tr> <tr> <td style="height: 15px;"> </td> <td> </td> </tr> </table>                                                                | UKRI, MRC, NIHR | Institution | Alexion, Orphalan, Univar, Vivet, Ultragenyx | Institution |  |  |
| UKRI, MRC, NIHR                                    | Institution                                                                                                                                                                    |                                                                                                                                                                                                                                                                                                                                                                                                                               |                 |             |                                              |             |  |  |
| Alexion, Orphalan, Univar, Vivet, Ultragenyx       | Institution                                                                                                                                                                    |                                                                                                                                                                                                                                                                                                                                                                                                                               |                 |             |                                              |             |  |  |
|                                                    |                                                                                                                                                                                |                                                                                                                                                                                                                                                                                                                                                                                                                               |                 |             |                                              |             |  |  |

|                                              |                                                                                                              | Name all entities with whom you have this relationship or indicate none (add rows as needed)                                                                                                                                                                                                                                                                                                          | Specifications/Comments (e.g., if payments were made to you or to your institution) |                    |         |                    |  |  |  |  |  |
|----------------------------------------------|--------------------------------------------------------------------------------------------------------------|-------------------------------------------------------------------------------------------------------------------------------------------------------------------------------------------------------------------------------------------------------------------------------------------------------------------------------------------------------------------------------------------------------|-------------------------------------------------------------------------------------|--------------------|---------|--------------------|--|--|--|--|--|
| 3                                            | Royalties or licenses                                                                                        | <input checked="" type="checkbox"/> <b>None</b><br><table border="1" style="width: 100%; border-collapse: collapse;"> <tr><td style="height: 20px;"> </td><td style="width: 20%;"> </td></tr> <tr><td style="height: 20px;"> </td><td> </td></tr> <tr><td style="height: 20px;"> </td><td> </td></tr> </table>                                                                                        |                                                                                     |                    |         |                    |  |  |  |  |  |
|                                              |                                                                                                              |                                                                                                                                                                                                                                                                                                                                                                                                       |                                                                                     |                    |         |                    |  |  |  |  |  |
|                                              |                                                                                                              |                                                                                                                                                                                                                                                                                                                                                                                                       |                                                                                     |                    |         |                    |  |  |  |  |  |
|                                              |                                                                                                              |                                                                                                                                                                                                                                                                                                                                                                                                       |                                                                                     |                    |         |                    |  |  |  |  |  |
| 4                                            | Consulting fees                                                                                              | <input type="checkbox"/> <b>None</b><br><table border="1" style="width: 100%; border-collapse: collapse;"> <tr><td style="height: 20px;">Arbomed</td><td style="width: 20%;">Payment made to me</td></tr> <tr><td style="height: 20px;">Alexion</td><td>Payment made to me</td></tr> <tr><td style="height: 20px;"> </td><td> </td></tr> <tr><td style="height: 20px;"> </td><td> </td></tr> </table> | Arbomed                                                                             | Payment made to me | Alexion | Payment made to me |  |  |  |  |  |
| Arbomed                                      | Payment made to me                                                                                           |                                                                                                                                                                                                                                                                                                                                                                                                       |                                                                                     |                    |         |                    |  |  |  |  |  |
| Alexion                                      | Payment made to me                                                                                           |                                                                                                                                                                                                                                                                                                                                                                                                       |                                                                                     |                    |         |                    |  |  |  |  |  |
|                                              |                                                                                                              |                                                                                                                                                                                                                                                                                                                                                                                                       |                                                                                     |                    |         |                    |  |  |  |  |  |
|                                              |                                                                                                              |                                                                                                                                                                                                                                                                                                                                                                                                       |                                                                                     |                    |         |                    |  |  |  |  |  |
| 5                                            | Payment or honoraria for lectures, presentations, speakers bureaus, manuscript writing or educational events | <input checked="" type="checkbox"/> <b>None</b><br><table border="1" style="width: 100%; border-collapse: collapse;"> <tr><td style="height: 20px;">Orphalan</td><td style="width: 20%;">Payment made to me</td></tr> <tr><td style="height: 20px;"> </td><td> </td></tr> <tr><td style="height: 20px;"> </td><td> </td></tr> </table>                                                                | Orphalan                                                                            | Payment made to me |         |                    |  |  |  |  |  |
| Orphalan                                     | Payment made to me                                                                                           |                                                                                                                                                                                                                                                                                                                                                                                                       |                                                                                     |                    |         |                    |  |  |  |  |  |
|                                              |                                                                                                              |                                                                                                                                                                                                                                                                                                                                                                                                       |                                                                                     |                    |         |                    |  |  |  |  |  |
|                                              |                                                                                                              |                                                                                                                                                                                                                                                                                                                                                                                                       |                                                                                     |                    |         |                    |  |  |  |  |  |
| 6                                            | Payment for expert testimony                                                                                 | <input checked="" type="checkbox"/> <b>None</b><br><table border="1" style="width: 100%; border-collapse: collapse;"> <tr><td style="height: 20px;"> </td><td style="width: 20%;"> </td></tr> <tr><td style="height: 20px;"> </td><td> </td></tr> <tr><td style="height: 20px;"> </td><td> </td></tr> </table>                                                                                        |                                                                                     |                    |         |                    |  |  |  |  |  |
|                                              |                                                                                                              |                                                                                                                                                                                                                                                                                                                                                                                                       |                                                                                     |                    |         |                    |  |  |  |  |  |
|                                              |                                                                                                              |                                                                                                                                                                                                                                                                                                                                                                                                       |                                                                                     |                    |         |                    |  |  |  |  |  |
|                                              |                                                                                                              |                                                                                                                                                                                                                                                                                                                                                                                                       |                                                                                     |                    |         |                    |  |  |  |  |  |
| 7                                            | Support for attending meetings and/or travel                                                                 | <input type="checkbox"/> <b>None</b><br><table border="1" style="width: 100%; border-collapse: collapse;"> <tr><td style="height: 20px;">Orphalan, Univar, Arbomed</td><td style="width: 20%;">Payment made to me</td></tr> <tr><td style="height: 20px;"> </td><td> </td></tr> <tr><td style="height: 20px;"> </td><td> </td></tr> </table>                                                          | Orphalan, Univar, Arbomed                                                           | Payment made to me |         |                    |  |  |  |  |  |
| Orphalan, Univar, Arbomed                    | Payment made to me                                                                                           |                                                                                                                                                                                                                                                                                                                                                                                                       |                                                                                     |                    |         |                    |  |  |  |  |  |
|                                              |                                                                                                              |                                                                                                                                                                                                                                                                                                                                                                                                       |                                                                                     |                    |         |                    |  |  |  |  |  |
|                                              |                                                                                                              |                                                                                                                                                                                                                                                                                                                                                                                                       |                                                                                     |                    |         |                    |  |  |  |  |  |
| 8                                            | Patents planned, issued or pending                                                                           | <input checked="" type="checkbox"/> <b>None</b><br><table border="1" style="width: 100%; border-collapse: collapse;"> <tr><td style="height: 20px;"> </td><td style="width: 20%;"> </td></tr> <tr><td style="height: 20px;"> </td><td> </td></tr> <tr><td style="height: 20px;"> </td><td> </td></tr> </table>                                                                                        |                                                                                     |                    |         |                    |  |  |  |  |  |
|                                              |                                                                                                              |                                                                                                                                                                                                                                                                                                                                                                                                       |                                                                                     |                    |         |                    |  |  |  |  |  |
|                                              |                                                                                                              |                                                                                                                                                                                                                                                                                                                                                                                                       |                                                                                     |                    |         |                    |  |  |  |  |  |
|                                              |                                                                                                              |                                                                                                                                                                                                                                                                                                                                                                                                       |                                                                                     |                    |         |                    |  |  |  |  |  |
| 9                                            | Participation on a Data Safety Monitoring Board or Advisory Board                                            | <input type="checkbox"/> <b>None</b><br><table border="1" style="width: 100%; border-collapse: collapse;"> <tr><td style="height: 20px;">Orphalan, Alexion, Univar, Vivet, Ultragenex</td><td style="width: 20%;">Payment made to me</td></tr> <tr><td style="height: 20px;"> </td><td> </td></tr> <tr><td style="height: 20px;"> </td><td> </td></tr> </table>                                       | Orphalan, Alexion, Univar, Vivet, Ultragenex                                        | Payment made to me |         |                    |  |  |  |  |  |
| Orphalan, Alexion, Univar, Vivet, Ultragenex | Payment made to me                                                                                           |                                                                                                                                                                                                                                                                                                                                                                                                       |                                                                                     |                    |         |                    |  |  |  |  |  |
|                                              |                                                                                                              |                                                                                                                                                                                                                                                                                                                                                                                                       |                                                                                     |                    |         |                    |  |  |  |  |  |
|                                              |                                                                                                              |                                                                                                                                                                                                                                                                                                                                                                                                       |                                                                                     |                    |         |                    |  |  |  |  |  |



|    |                                                                                                   | Name all entities with whom you have this relationship or indicate none (add rows as needed)                              | Specifications/Comments (e.g., if payments were made to you or to your institution) |
|----|---------------------------------------------------------------------------------------------------|---------------------------------------------------------------------------------------------------------------------------|-------------------------------------------------------------------------------------|
| 10 | Leadership or fiduciary role in other board, society, committee or advocacy group, paid or unpaid | <input type="checkbox"/> None                                                                                             |                                                                                     |
|    |                                                                                                   | British Association for the Study of the Liver Chair of special Interest Group in Rare Liver Disease and Wilson's Disease | Unpaid                                                                              |
|    |                                                                                                   | Member of the Wilson's Disease Support Group-UK                                                                           | Unpaid                                                                              |
|    |                                                                                                   | Wilson Disease Association Medical Advisory Committee                                                                     | Unpaid                                                                              |
| 11 | Stock or stock options                                                                            | <input checked="" type="checkbox"/> None                                                                                  |                                                                                     |
|    |                                                                                                   |                                                                                                                           |                                                                                     |
|    |                                                                                                   |                                                                                                                           |                                                                                     |
| 12 | Receipt of equipment, materials, drugs, medical writing, gifts or other services                  | <input checked="" type="checkbox"/> None                                                                                  |                                                                                     |
|    |                                                                                                   |                                                                                                                           |                                                                                     |
|    |                                                                                                   |                                                                                                                           |                                                                                     |
| 13 | Other financial or non-financial interests                                                        | <input checked="" type="checkbox"/> None                                                                                  |                                                                                     |
|    |                                                                                                   |                                                                                                                           |                                                                                     |
|    |                                                                                                   |                                                                                                                           |                                                                                     |

Please place an "X" next to the following statement to indicate your agreement:

I certify that I have answered every question and have not altered the wording of any of the questions on this form.

### ICMJE DISCLOSURE FORM

**Date:** Click or tap to enter a date. 13 MAR 2024

**Your Name:** Click or tap here to enter text. DAVID CASSIDAN

**Manuscript Title:** Non-ceruloplasmin copper and urinary copper in clinically stable Wilson Disease: Alignment with recommended targets and values in healthy persons

**Manuscript Number (if known):** JHEPR-D-23-01117

In the interest of transparency, we ask you to disclose all relationships/activities/interests listed below that are related to the content of your manuscript. "Related" means any relation with for-profit or not-for-profit third parties whose interests may be affected by the content of the manuscript. Disclosure represents a commitment to transparency and does not necessarily indicate a bias. If you are in doubt about whether to list a relationship/activity/interest, it is preferable that you do so.

The author's relationships/activities/interests should be defined broadly. For example, if your manuscript pertains to the epidemiology of hypertension, you should declare all relationships with manufacturers of antihypertensive medication, even if that medication is not mentioned in the manuscript.

In item #1 below, report all support for the work reported in this manuscript without time limit. For all other items, the time frame for disclosure is the past 36 months.

|                                                           |                                                                                                                                                                         | Name all entities with whom you have this relationship or indicate none (add rows as needed) | Specifications/Comments (e.g., if payments were made to you or to your institution) |
|-----------------------------------------------------------|-------------------------------------------------------------------------------------------------------------------------------------------------------------------------|----------------------------------------------------------------------------------------------|-------------------------------------------------------------------------------------|
| <b>Time frame: Since the initial planning of the work</b> |                                                                                                                                                                         |                                                                                              |                                                                                     |
| 1                                                         | All support for the present manuscript (e.g., funding, provision of study materials, medical writing, article processing charges, etc.)<br>No time limit for this item. | <input type="checkbox"/> None                                                                |                                                                                     |
|                                                           |                                                                                                                                                                         | <u>ORPHALAN</u>                                                                              | <u>data management</u>                                                              |
|                                                           |                                                                                                                                                                         |                                                                                              | <u>writing support</u>                                                              |
| <b>Time frame: past 36 months</b>                         |                                                                                                                                                                         |                                                                                              |                                                                                     |
| 2                                                         | Grants or contracts from any entity (if not indicated in item #1 above).                                                                                                | <input checked="" type="checkbox"/> None                                                     |                                                                                     |
|                                                           |                                                                                                                                                                         |                                                                                              |                                                                                     |
|                                                           |                                                                                                                                                                         |                                                                                              |                                                                                     |
| 3                                                         | Royalties or licenses                                                                                                                                                   | <input checked="" type="checkbox"/> None                                                     |                                                                                     |
|                                                           |                                                                                                                                                                         |                                                                                              |                                                                                     |
|                                                           |                                                                                                                                                                         |                                                                                              |                                                                                     |

|    |                                                                                                              | Name all entities with whom you have this relationship or indicate none (add rows as needed) | Specifications/Comments (e.g., if payments were made to you or to your institution) |
|----|--------------------------------------------------------------------------------------------------------------|----------------------------------------------------------------------------------------------|-------------------------------------------------------------------------------------|
| 4  | Consulting fees                                                                                              | <input type="checkbox"/> None<br>SANOFI<br>TAKEDA<br>CHIESI<br>ARIELUS                       | } to the                                                                            |
| 5  | Payment or honoraria for lectures, presentations, speakers bureaus, manuscript writing or educational events | <input checked="" type="checkbox"/> None                                                     |                                                                                     |
| 6  | Payment for expert testimony                                                                                 | <input checked="" type="checkbox"/> None                                                     |                                                                                     |
| 7  | Support for attending meetings and/or travel                                                                 | <input type="checkbox"/> None<br>SAME AS ABOVE                                               |                                                                                     |
| 8  | Patents planned, issued or pending                                                                           | <input checked="" type="checkbox"/> None                                                     |                                                                                     |
| 9  | Participation on a Data Safety Monitoring Board or Advisory Board                                            | <input type="checkbox"/> None<br>SAME                                                        |                                                                                     |
| 10 | Leadership or fiduciary role in other board, society, committee or advocacy group, paid or unpaid            | <input checked="" type="checkbox"/> None                                                     |                                                                                     |



|    |                                                                                  | Name all entities with whom you have this relationship or indicate none (add rows as needed) | Specifications/Comments (e.g., if payments were made to you or to your institution) |
|----|----------------------------------------------------------------------------------|----------------------------------------------------------------------------------------------|-------------------------------------------------------------------------------------|
| 11 | Stock or stock options                                                           | <input checked="" type="checkbox"/> None                                                     |                                                                                     |
|    |                                                                                  |                                                                                              |                                                                                     |
|    |                                                                                  |                                                                                              |                                                                                     |
| 12 | Receipt of equipment, materials, drugs, medical writing, gifts or other services | <input checked="" type="checkbox"/> None                                                     |                                                                                     |
|    |                                                                                  |                                                                                              |                                                                                     |
|    |                                                                                  |                                                                                              |                                                                                     |
| 13 | Other financial or non-financial interests                                       | <input checked="" type="checkbox"/> None                                                     |                                                                                     |
|    |                                                                                  |                                                                                              |                                                                                     |
|    |                                                                                  |                                                                                              |                                                                                     |

Please place an "X" next to the following statement to indicate your agreement:

I certify that I have answered every question and have not altered the wording of any of the questions on this form.

*J. O'Shea*  
13 MAR 2024

### ICMJE DISCLOSURE FORM

**Date:** Click or tap to enter a date.

**Your Name:** Eduardo COUCHONNAL BEDOYA

**Manuscript Title:** **Non-ceruloplasmin copper and urinary copper in clinically stable Wilson Disease: Alignment with recommended targets and values in healthy persons**

**Manuscript Number (if known):** JHEPR-D-23-01117

In the interest of transparency, we ask you to disclose all relationships/activities/interests listed below that are related to the content of your manuscript. "Related" means any relation with for-profit or not-for-profit third parties whose interests may be affected by the content of the manuscript. Disclosure represents a commitment to transparency and does not necessarily indicate a bias. If you are in doubt about whether to list a relationship/activity/interest, it is preferable that you do so.

The author's relationships/activities/interests should be defined broadly. For example, if your manuscript pertains to the epidemiology of hypertension, you should declare all relationships with manufacturers of antihypertensive medication, even if that medication is not mentioned in the manuscript.

In item #1 below, report all support for the work reported in this manuscript without time limit. For all other items, the time frame for disclosure is the past 36 months.

|                                                    | Name all entities with whom you have this relationship or indicate none (add rows as needed)                                                                                   | Specifications/Comments (e.g., if payments were made to you or to your institution)                                                                                                                                                                                                                                                                                           |  |  |  |  |  |  |
|----------------------------------------------------|--------------------------------------------------------------------------------------------------------------------------------------------------------------------------------|-------------------------------------------------------------------------------------------------------------------------------------------------------------------------------------------------------------------------------------------------------------------------------------------------------------------------------------------------------------------------------|--|--|--|--|--|--|
| Time frame: Since the initial planning of the work |                                                                                                                                                                                |                                                                                                                                                                                                                                                                                                                                                                               |  |  |  |  |  |  |
| <b>1</b>                                           | All support for the present manuscript (e.g., funding, provision of study materials, medical writing, article processing charges, etc.)<br><b>No time limit for this item.</b> | <input checked="" type="checkbox"/> <b>None</b><br><table border="1" style="width: 100%; height: 40px; margin-top: 5px;"> <tr><td style="width: 60%;"></td><td style="width: 40%;"></td></tr> <tr><td></td><td></td></tr> <tr><td></td><td></td></tr> </table> <p style="font-size: small; text-align: right; margin-top: 5px;">Click the tab key to add additional rows.</p> |  |  |  |  |  |  |
|                                                    |                                                                                                                                                                                |                                                                                                                                                                                                                                                                                                                                                                               |  |  |  |  |  |  |
|                                                    |                                                                                                                                                                                |                                                                                                                                                                                                                                                                                                                                                                               |  |  |  |  |  |  |
|                                                    |                                                                                                                                                                                |                                                                                                                                                                                                                                                                                                                                                                               |  |  |  |  |  |  |
| Time frame: past 36 months                         |                                                                                                                                                                                |                                                                                                                                                                                                                                                                                                                                                                               |  |  |  |  |  |  |
| <b>2</b>                                           | Grants or contracts from any entity (if not indicated in item #1 above).                                                                                                       | <input checked="" type="checkbox"/> <b>None</b><br><table border="1" style="width: 100%; height: 40px; margin-top: 5px;"> <tr><td style="width: 60%;"></td><td style="width: 40%;"></td></tr> <tr><td></td><td></td></tr> <tr><td></td><td></td></tr> </table>                                                                                                                |  |  |  |  |  |  |
|                                                    |                                                                                                                                                                                |                                                                                                                                                                                                                                                                                                                                                                               |  |  |  |  |  |  |
|                                                    |                                                                                                                                                                                |                                                                                                                                                                                                                                                                                                                                                                               |  |  |  |  |  |  |
|                                                    |                                                                                                                                                                                |                                                                                                                                                                                                                                                                                                                                                                               |  |  |  |  |  |  |
| <b>3</b>                                           | Royalties or licenses                                                                                                                                                          | <input checked="" type="checkbox"/> <b>None</b><br><table border="1" style="width: 100%; height: 40px; margin-top: 5px;"> <tr><td style="width: 60%;"></td><td style="width: 40%;"></td></tr> <tr><td></td><td></td></tr> <tr><td></td><td></td></tr> </table>                                                                                                                |  |  |  |  |  |  |
|                                                    |                                                                                                                                                                                |                                                                                                                                                                                                                                                                                                                                                                               |  |  |  |  |  |  |
|                                                    |                                                                                                                                                                                |                                                                                                                                                                                                                                                                                                                                                                               |  |  |  |  |  |  |
|                                                    |                                                                                                                                                                                |                                                                                                                                                                                                                                                                                                                                                                               |  |  |  |  |  |  |

|          |                                                                                                              | Name all entities with whom you have this relationship or indicate none (add rows as needed)                                                                                                                                           | Specifications/Comments (e.g., if payments were made to you or to your institution) |  |        |  |         |  |       |                           |  |
|----------|--------------------------------------------------------------------------------------------------------------|----------------------------------------------------------------------------------------------------------------------------------------------------------------------------------------------------------------------------------------|-------------------------------------------------------------------------------------|--|--------|--|---------|--|-------|---------------------------|--|
| 4        | Consulting fees                                                                                              | <input type="checkbox"/> <b>None</b><br><table border="1"> <tr><td>ORPHALAN</td><td></td></tr> <tr><td>UNIVAR</td><td></td></tr> <tr><td>ALEXION</td><td></td></tr> <tr><td>VIVET</td><td>Payment to my institution</td></tr> </table> | ORPHALAN                                                                            |  | UNIVAR |  | ALEXION |  | VIVET | Payment to my institution |  |
| ORPHALAN |                                                                                                              |                                                                                                                                                                                                                                        |                                                                                     |  |        |  |         |  |       |                           |  |
| UNIVAR   |                                                                                                              |                                                                                                                                                                                                                                        |                                                                                     |  |        |  |         |  |       |                           |  |
| ALEXION  |                                                                                                              |                                                                                                                                                                                                                                        |                                                                                     |  |        |  |         |  |       |                           |  |
| VIVET    | Payment to my institution                                                                                    |                                                                                                                                                                                                                                        |                                                                                     |  |        |  |         |  |       |                           |  |
| 5        | Payment or honoraria for lectures, presentations, speakers bureaus, manuscript writing or educational events | <input type="checkbox"/> <b>None</b><br><table border="1"> <tr><td>ORPHALAN</td><td></td></tr> <tr><td></td><td></td></tr> <tr><td></td><td></td></tr> </table>                                                                        | ORPHALAN                                                                            |  |        |  |         |  |       |                           |  |
| ORPHALAN |                                                                                                              |                                                                                                                                                                                                                                        |                                                                                     |  |        |  |         |  |       |                           |  |
|          |                                                                                                              |                                                                                                                                                                                                                                        |                                                                                     |  |        |  |         |  |       |                           |  |
|          |                                                                                                              |                                                                                                                                                                                                                                        |                                                                                     |  |        |  |         |  |       |                           |  |
| 6        | Payment for expert testimony                                                                                 | <input checked="" type="checkbox"/> <b>None</b><br><table border="1"> <tr><td></td><td></td></tr> <tr><td></td><td></td></tr> <tr><td></td><td></td></tr> </table>                                                                     |                                                                                     |  |        |  |         |  |       |                           |  |
|          |                                                                                                              |                                                                                                                                                                                                                                        |                                                                                     |  |        |  |         |  |       |                           |  |
|          |                                                                                                              |                                                                                                                                                                                                                                        |                                                                                     |  |        |  |         |  |       |                           |  |
|          |                                                                                                              |                                                                                                                                                                                                                                        |                                                                                     |  |        |  |         |  |       |                           |  |
| 7        | Support for attending meetings and/or travel                                                                 | <input checked="" type="checkbox"/> <b>None</b><br><table border="1"> <tr><td>ORPHALAN</td><td></td></tr> <tr><td>UNIVAR</td><td></td></tr> <tr><td></td><td></td></tr> </table>                                                       | ORPHALAN                                                                            |  | UNIVAR |  |         |  |       |                           |  |
| ORPHALAN |                                                                                                              |                                                                                                                                                                                                                                        |                                                                                     |  |        |  |         |  |       |                           |  |
| UNIVAR   |                                                                                                              |                                                                                                                                                                                                                                        |                                                                                     |  |        |  |         |  |       |                           |  |
|          |                                                                                                              |                                                                                                                                                                                                                                        |                                                                                     |  |        |  |         |  |       |                           |  |
| 8        | Patents planned, issued or pending                                                                           | <input checked="" type="checkbox"/> <b>None</b><br><table border="1"> <tr><td></td><td></td></tr> <tr><td></td><td></td></tr> <tr><td></td><td></td></tr> </table>                                                                     |                                                                                     |  |        |  |         |  |       |                           |  |
|          |                                                                                                              |                                                                                                                                                                                                                                        |                                                                                     |  |        |  |         |  |       |                           |  |
|          |                                                                                                              |                                                                                                                                                                                                                                        |                                                                                     |  |        |  |         |  |       |                           |  |
|          |                                                                                                              |                                                                                                                                                                                                                                        |                                                                                     |  |        |  |         |  |       |                           |  |
| 9        | Participation on a Data Safety Monitoring Board or Advisory Board                                            | <input checked="" type="checkbox"/> <b>None</b><br><table border="1"> <tr><td></td><td></td></tr> <tr><td></td><td></td></tr> <tr><td></td><td></td></tr> </table>                                                                     |                                                                                     |  |        |  |         |  |       |                           |  |
|          |                                                                                                              |                                                                                                                                                                                                                                        |                                                                                     |  |        |  |         |  |       |                           |  |
|          |                                                                                                              |                                                                                                                                                                                                                                        |                                                                                     |  |        |  |         |  |       |                           |  |
|          |                                                                                                              |                                                                                                                                                                                                                                        |                                                                                     |  |        |  |         |  |       |                           |  |
| 10       | Leadership or fiduciary role in other board, society, committee or advocacy group, paid or unpaid            | <input checked="" type="checkbox"/> <b>None</b><br><table border="1"> <tr><td></td><td></td></tr> <tr><td></td><td></td></tr> <tr><td></td><td></td></tr> </table>                                                                     |                                                                                     |  |        |  |         |  |       |                           |  |
|          |                                                                                                              |                                                                                                                                                                                                                                        |                                                                                     |  |        |  |         |  |       |                           |  |
|          |                                                                                                              |                                                                                                                                                                                                                                        |                                                                                     |  |        |  |         |  |       |                           |  |
|          |                                                                                                              |                                                                                                                                                                                                                                        |                                                                                     |  |        |  |         |  |       |                           |  |

|           |                                                                                  | Name all entities with whom you have this relationship or indicate none (add rows as needed) | Specifications/Comments (e.g., if payments were made to you or to your institution) |
|-----------|----------------------------------------------------------------------------------|----------------------------------------------------------------------------------------------|-------------------------------------------------------------------------------------|
| <b>11</b> | Stock or stock options                                                           | <input checked="" type="checkbox"/> <b>None</b>                                              |                                                                                     |
|           |                                                                                  |                                                                                              |                                                                                     |
|           |                                                                                  |                                                                                              |                                                                                     |
| <b>12</b> | Receipt of equipment, materials, drugs, medical writing, gifts or other services | <input checked="" type="checkbox"/> <b>None</b>                                              |                                                                                     |
|           |                                                                                  |                                                                                              |                                                                                     |
|           |                                                                                  |                                                                                              |                                                                                     |
| <b>13</b> | Other financial or non-financial interests                                       | <input checked="" type="checkbox"/> <b>None</b>                                              |                                                                                     |
|           |                                                                                  |                                                                                              |                                                                                     |
|           |                                                                                  |                                                                                              |                                                                                     |

Please place an "X" next to the following statement to indicate your agreement:

I certify that I have answered every question and have not altered the wording of any of the questions on this form.

### ICMJE DISCLOSURE FORM

**Date:** 3/11/2024

**Your Name:** Rubens Gisber Cury

**Manuscript Title:** Non-ceruloplasmin copper and urinary copper in clinically stable Wilson Disease: Alignment with recommended targets and values in healthy persons

**Manuscript Number (if known):** JHEPR-D-23-01117

In the interest of transparency, we ask you to disclose all relationships/activities/interests listed below that are related to the content of your manuscript. "Related" means any relation with for-profit or not-for-profit third parties whose interests may be affected by the content of the manuscript. Disclosure represents a commitment to transparency and does not necessarily indicate a bias. If you are in doubt about whether to list a relationship/activity/interest, it is preferable that you do so.

The author's relationships/activities/interests should be defined broadly. For example, if your manuscript pertains to the epidemiology of hypertension, you should declare all relationships with manufacturers of antihypertensive medication, even if that medication is not mentioned in the manuscript.

In item #1 below, report all support for the work reported in this manuscript without time limit. For all other items, the time frame for disclosure is the past 36 months.

|                                                                                                                                                                                 | Name all entities with whom you have this relationship or indicate none (add rows as needed)                                                                                   | Specifications/Comments (e.g., if payments were made to you or to your institution)                                                                                                                                                                                                                                                                                                                                                                                                                                                                                                     |                                                                                                                                                                                 |  |                                                      |  |                                           |  |
|---------------------------------------------------------------------------------------------------------------------------------------------------------------------------------|--------------------------------------------------------------------------------------------------------------------------------------------------------------------------------|-----------------------------------------------------------------------------------------------------------------------------------------------------------------------------------------------------------------------------------------------------------------------------------------------------------------------------------------------------------------------------------------------------------------------------------------------------------------------------------------------------------------------------------------------------------------------------------------|---------------------------------------------------------------------------------------------------------------------------------------------------------------------------------|--|------------------------------------------------------|--|-------------------------------------------|--|
| Time frame: Since the initial planning of the work                                                                                                                              |                                                                                                                                                                                |                                                                                                                                                                                                                                                                                                                                                                                                                                                                                                                                                                                         |                                                                                                                                                                                 |  |                                                      |  |                                           |  |
| <b>1</b>                                                                                                                                                                        | All support for the present manuscript (e.g., funding, provision of study materials, medical writing, article processing charges, etc.)<br><b>No time limit for this item.</b> | <input type="checkbox"/> <b>None</b><br><br><table border="1" style="width: 100%; border-collapse: collapse;"> <tr> <td style="width: 60%;">The paper is a secondary analysis of data collected during the Chelate trial (NCT03539952) and the sponsor of this trial (Orphalan, ASA France) generously provided these data.</td> <td style="width: 40%;"></td> </tr> <tr> <td>I don't have personal support related to this paper.</td> <td></td> </tr> <tr> <td colspan="2" style="text-align: right; font-size: small;">Click the tab key to add additional rows.</td> </tr> </table> | The paper is a secondary analysis of data collected during the Chelate trial (NCT03539952) and the sponsor of this trial (Orphalan, ASA France) generously provided these data. |  | I don't have personal support related to this paper. |  | Click the tab key to add additional rows. |  |
| The paper is a secondary analysis of data collected during the Chelate trial (NCT03539952) and the sponsor of this trial (Orphalan, ASA France) generously provided these data. |                                                                                                                                                                                |                                                                                                                                                                                                                                                                                                                                                                                                                                                                                                                                                                                         |                                                                                                                                                                                 |  |                                                      |  |                                           |  |
| I don't have personal support related to this paper.                                                                                                                            |                                                                                                                                                                                |                                                                                                                                                                                                                                                                                                                                                                                                                                                                                                                                                                                         |                                                                                                                                                                                 |  |                                                      |  |                                           |  |
| Click the tab key to add additional rows.                                                                                                                                       |                                                                                                                                                                                |                                                                                                                                                                                                                                                                                                                                                                                                                                                                                                                                                                                         |                                                                                                                                                                                 |  |                                                      |  |                                           |  |
| Time frame: past 36 months                                                                                                                                                      |                                                                                                                                                                                |                                                                                                                                                                                                                                                                                                                                                                                                                                                                                                                                                                                         |                                                                                                                                                                                 |  |                                                      |  |                                           |  |
| <b>2</b>                                                                                                                                                                        | Grants or contracts from any entity (if not indicated in item #1 above).                                                                                                       | <input type="checkbox"/> <b>None</b><br><br><table border="1" style="width: 100%; border-collapse: collapse;"> <tr><td style="width: 60%; height: 20px;"></td><td style="width: 40%;"></td></tr> <tr><td style="height: 20px;"></td><td></td></tr> <tr><td style="height: 20px;"></td><td></td></tr> </table>                                                                                                                                                                                                                                                                           |                                                                                                                                                                                 |  |                                                      |  |                                           |  |
|                                                                                                                                                                                 |                                                                                                                                                                                |                                                                                                                                                                                                                                                                                                                                                                                                                                                                                                                                                                                         |                                                                                                                                                                                 |  |                                                      |  |                                           |  |
|                                                                                                                                                                                 |                                                                                                                                                                                |                                                                                                                                                                                                                                                                                                                                                                                                                                                                                                                                                                                         |                                                                                                                                                                                 |  |                                                      |  |                                           |  |
|                                                                                                                                                                                 |                                                                                                                                                                                |                                                                                                                                                                                                                                                                                                                                                                                                                                                                                                                                                                                         |                                                                                                                                                                                 |  |                                                      |  |                                           |  |
| <b>3</b>                                                                                                                                                                        | Royalties or licenses                                                                                                                                                          | <input checked="" type="checkbox"/> <b>None</b><br><br><table border="1" style="width: 100%; border-collapse: collapse;"> <tr><td style="width: 60%; height: 20px;"></td><td style="width: 40%;"></td></tr> <tr><td style="height: 20px;"></td><td></td></tr> <tr><td style="height: 20px;"></td><td></td></tr> </table>                                                                                                                                                                                                                                                                |                                                                                                                                                                                 |  |                                                      |  |                                           |  |
|                                                                                                                                                                                 |                                                                                                                                                                                |                                                                                                                                                                                                                                                                                                                                                                                                                                                                                                                                                                                         |                                                                                                                                                                                 |  |                                                      |  |                                           |  |
|                                                                                                                                                                                 |                                                                                                                                                                                |                                                                                                                                                                                                                                                                                                                                                                                                                                                                                                                                                                                         |                                                                                                                                                                                 |  |                                                      |  |                                           |  |
|                                                                                                                                                                                 |                                                                                                                                                                                |                                                                                                                                                                                                                                                                                                                                                                                                                                                                                                                                                                                         |                                                                                                                                                                                 |  |                                                      |  |                                           |  |



|    |                                                                                                              | Name all entities with whom you have this relationship or indicate none (add rows as needed)                                                                                                                                                                                                                         | Specifications/Comments (e.g., if payments were made to you or to your institution) |  |  |  |  |  |  |
|----|--------------------------------------------------------------------------------------------------------------|----------------------------------------------------------------------------------------------------------------------------------------------------------------------------------------------------------------------------------------------------------------------------------------------------------------------|-------------------------------------------------------------------------------------|--|--|--|--|--|--|
| 4  | Consulting fees                                                                                              | <input checked="" type="checkbox"/> <b>None</b><br><table border="1" style="width: 100%; border-collapse: collapse;"> <tr><td style="width: 50%; height: 20px;"></td><td style="width: 50%;"></td></tr> <tr><td style="height: 20px;"></td><td></td></tr> <tr><td style="height: 20px;"></td><td></td></tr> </table> |                                                                                     |  |  |  |  |  |  |
|    |                                                                                                              |                                                                                                                                                                                                                                                                                                                      |                                                                                     |  |  |  |  |  |  |
|    |                                                                                                              |                                                                                                                                                                                                                                                                                                                      |                                                                                     |  |  |  |  |  |  |
|    |                                                                                                              |                                                                                                                                                                                                                                                                                                                      |                                                                                     |  |  |  |  |  |  |
| 5  | Payment or honoraria for lectures, presentations, speakers bureaus, manuscript writing or educational events | <input checked="" type="checkbox"/> <b>None</b><br><table border="1" style="width: 100%; border-collapse: collapse;"> <tr><td style="width: 50%; height: 20px;"></td><td style="width: 50%;"></td></tr> <tr><td style="height: 20px;"></td><td></td></tr> <tr><td style="height: 20px;"></td><td></td></tr> </table> |                                                                                     |  |  |  |  |  |  |
|    |                                                                                                              |                                                                                                                                                                                                                                                                                                                      |                                                                                     |  |  |  |  |  |  |
|    |                                                                                                              |                                                                                                                                                                                                                                                                                                                      |                                                                                     |  |  |  |  |  |  |
|    |                                                                                                              |                                                                                                                                                                                                                                                                                                                      |                                                                                     |  |  |  |  |  |  |
| 6  | Payment for expert testimony                                                                                 | <input checked="" type="checkbox"/> <b>None</b><br><table border="1" style="width: 100%; border-collapse: collapse;"> <tr><td style="width: 50%; height: 20px;"></td><td style="width: 50%;"></td></tr> <tr><td style="height: 20px;"></td><td></td></tr> <tr><td style="height: 20px;"></td><td></td></tr> </table> |                                                                                     |  |  |  |  |  |  |
|    |                                                                                                              |                                                                                                                                                                                                                                                                                                                      |                                                                                     |  |  |  |  |  |  |
|    |                                                                                                              |                                                                                                                                                                                                                                                                                                                      |                                                                                     |  |  |  |  |  |  |
|    |                                                                                                              |                                                                                                                                                                                                                                                                                                                      |                                                                                     |  |  |  |  |  |  |
| 7  | Support for attending meetings and/or travel                                                                 | <input checked="" type="checkbox"/> <b>None</b><br><table border="1" style="width: 100%; border-collapse: collapse;"> <tr><td style="width: 50%; height: 20px;"></td><td style="width: 50%;"></td></tr> <tr><td style="height: 20px;"></td><td></td></tr> <tr><td style="height: 20px;"></td><td></td></tr> </table> |                                                                                     |  |  |  |  |  |  |
|    |                                                                                                              |                                                                                                                                                                                                                                                                                                                      |                                                                                     |  |  |  |  |  |  |
|    |                                                                                                              |                                                                                                                                                                                                                                                                                                                      |                                                                                     |  |  |  |  |  |  |
|    |                                                                                                              |                                                                                                                                                                                                                                                                                                                      |                                                                                     |  |  |  |  |  |  |
| 8  | Patents planned, issued or pending                                                                           | <input checked="" type="checkbox"/> <b>None</b><br><table border="1" style="width: 100%; border-collapse: collapse;"> <tr><td style="width: 50%; height: 20px;"></td><td style="width: 50%;"></td></tr> <tr><td style="height: 20px;"></td><td></td></tr> <tr><td style="height: 20px;"></td><td></td></tr> </table> |                                                                                     |  |  |  |  |  |  |
|    |                                                                                                              |                                                                                                                                                                                                                                                                                                                      |                                                                                     |  |  |  |  |  |  |
|    |                                                                                                              |                                                                                                                                                                                                                                                                                                                      |                                                                                     |  |  |  |  |  |  |
|    |                                                                                                              |                                                                                                                                                                                                                                                                                                                      |                                                                                     |  |  |  |  |  |  |
| 9  | Participation on a Data Safety Monitoring Board or Advisory Board                                            | <input checked="" type="checkbox"/> <b>None</b><br><table border="1" style="width: 100%; border-collapse: collapse;"> <tr><td style="width: 50%; height: 20px;"></td><td style="width: 50%;"></td></tr> <tr><td style="height: 20px;"></td><td></td></tr> <tr><td style="height: 20px;"></td><td></td></tr> </table> |                                                                                     |  |  |  |  |  |  |
|    |                                                                                                              |                                                                                                                                                                                                                                                                                                                      |                                                                                     |  |  |  |  |  |  |
|    |                                                                                                              |                                                                                                                                                                                                                                                                                                                      |                                                                                     |  |  |  |  |  |  |
|    |                                                                                                              |                                                                                                                                                                                                                                                                                                                      |                                                                                     |  |  |  |  |  |  |
| 10 | Leadership or fiduciary role in other board, society, committee or advocacy group, paid or unpaid            | <input checked="" type="checkbox"/> <b>None</b><br><table border="1" style="width: 100%; border-collapse: collapse;"> <tr><td style="width: 50%; height: 20px;"></td><td style="width: 50%;"></td></tr> <tr><td style="height: 20px;"></td><td></td></tr> <tr><td style="height: 20px;"></td><td></td></tr> </table> |                                                                                     |  |  |  |  |  |  |
|    |                                                                                                              |                                                                                                                                                                                                                                                                                                                      |                                                                                     |  |  |  |  |  |  |
|    |                                                                                                              |                                                                                                                                                                                                                                                                                                                      |                                                                                     |  |  |  |  |  |  |
|    |                                                                                                              |                                                                                                                                                                                                                                                                                                                      |                                                                                     |  |  |  |  |  |  |

|           |                                                                                  | Name all entities with whom you have this relationship or indicate none (add rows as needed)                                                                                                          | Specifications/Comments (e.g., if payments were made to you or to your institution) |  |  |  |  |  |  |
|-----------|----------------------------------------------------------------------------------|-------------------------------------------------------------------------------------------------------------------------------------------------------------------------------------------------------|-------------------------------------------------------------------------------------|--|--|--|--|--|--|
| <b>11</b> | Stock or stock options                                                           | <input checked="" type="checkbox"/> <b>None</b><br><table border="1" data-bbox="376 412 1490 510"> <tr><td> </td><td> </td></tr> <tr><td> </td><td> </td></tr> <tr><td> </td><td> </td></tr> </table> |                                                                                     |  |  |  |  |  |  |
|           |                                                                                  |                                                                                                                                                                                                       |                                                                                     |  |  |  |  |  |  |
|           |                                                                                  |                                                                                                                                                                                                       |                                                                                     |  |  |  |  |  |  |
|           |                                                                                  |                                                                                                                                                                                                       |                                                                                     |  |  |  |  |  |  |
| <b>12</b> | Receipt of equipment, materials, drugs, medical writing, gifts or other services | <input checked="" type="checkbox"/> <b>None</b><br><table border="1" data-bbox="376 622 1490 721"> <tr><td> </td><td> </td></tr> <tr><td> </td><td> </td></tr> <tr><td> </td><td> </td></tr> </table> |                                                                                     |  |  |  |  |  |  |
|           |                                                                                  |                                                                                                                                                                                                       |                                                                                     |  |  |  |  |  |  |
|           |                                                                                  |                                                                                                                                                                                                       |                                                                                     |  |  |  |  |  |  |
|           |                                                                                  |                                                                                                                                                                                                       |                                                                                     |  |  |  |  |  |  |
| <b>13</b> | Other financial or non-financial interests                                       | <input checked="" type="checkbox"/> <b>None</b><br><table border="1" data-bbox="376 831 1490 929"> <tr><td> </td><td> </td></tr> <tr><td> </td><td> </td></tr> <tr><td> </td><td> </td></tr> </table> |                                                                                     |  |  |  |  |  |  |
|           |                                                                                  |                                                                                                                                                                                                       |                                                                                     |  |  |  |  |  |  |
|           |                                                                                  |                                                                                                                                                                                                       |                                                                                     |  |  |  |  |  |  |
|           |                                                                                  |                                                                                                                                                                                                       |                                                                                     |  |  |  |  |  |  |

Please place an "X" next to the following statement to indicate your agreement:

I certify that I have answered every question and have not altered the wording of any of the questions on this form.

### ICMJE DISCLOSURE FORM

**Date:** 3/13/2024

**Your Name:** Anna Czlonkowska

**Manuscript Title:** Non-ceruloplasmin copper and urinary copper in clinically stable Wilson Disease: Alignment with recommended targets and values in healthy persons

**Manuscript Number (if known):** JHEPR-D-23-01117

In the interest of transparency, we ask you to disclose all relationships/activities/interests listed below that are related to the content of your manuscript. "Related" means any relation with for-profit or not-for-profit third parties whose interests may be affected by the content of the manuscript. Disclosure represents a commitment to transparency and does not necessarily indicate a bias. If you are in doubt about whether to list a relationship/activity/interest, it is preferable that you do so.

The author's relationships/activities/interests should be defined broadly. For example, if your manuscript pertains to the epidemiology of hypertension, you should declare all relationships with manufacturers of antihypertensive medication, even if that medication is not mentioned in the manuscript.

In item #1 below, report all support for the work reported in this manuscript without time limit. For all other items, the time frame for disclosure is the past 36 months.

|                                                                          | Name all entities with whom you have this relationship or indicate none (add rows as needed)                                                                                   | Specifications/Comments (e.g., if payments were made to you or to your institution)                                                                                                                                                                                                                                                                                                                                             |                                                                          |                                                                      |  |  |                                           |  |
|--------------------------------------------------------------------------|--------------------------------------------------------------------------------------------------------------------------------------------------------------------------------|---------------------------------------------------------------------------------------------------------------------------------------------------------------------------------------------------------------------------------------------------------------------------------------------------------------------------------------------------------------------------------------------------------------------------------|--------------------------------------------------------------------------|----------------------------------------------------------------------|--|--|-------------------------------------------|--|
| Time frame: Since the initial planning of the work                       |                                                                                                                                                                                |                                                                                                                                                                                                                                                                                                                                                                                                                                 |                                                                          |                                                                      |  |  |                                           |  |
| <b>1</b>                                                                 | All support for the present manuscript (e.g., funding, provision of study materials, medical writing, article processing charges, etc.)<br><b>No time limit for this item.</b> | <input type="checkbox"/> <b>None</b><br><table border="1" style="width: 100%; border-collapse: collapse; margin-top: 5px;"> <tr> <td style="width: 60%;">GMP -Orphan</td> <td>CHELATE study, PI in this study (institutional and personal payment)</td> </tr> <tr> <td> </td> <td> </td> </tr> <tr> <td colspan="2" style="text-align: center; font-size: small;">Click the tab key to add additional rows.</td> </tr> </table> | GMP -Orphan                                                              | CHELATE study, PI in this study (institutional and personal payment) |  |  | Click the tab key to add additional rows. |  |
| GMP -Orphan                                                              | CHELATE study, PI in this study (institutional and personal payment)                                                                                                           |                                                                                                                                                                                                                                                                                                                                                                                                                                 |                                                                          |                                                                      |  |  |                                           |  |
|                                                                          |                                                                                                                                                                                |                                                                                                                                                                                                                                                                                                                                                                                                                                 |                                                                          |                                                                      |  |  |                                           |  |
| Click the tab key to add additional rows.                                |                                                                                                                                                                                |                                                                                                                                                                                                                                                                                                                                                                                                                                 |                                                                          |                                                                      |  |  |                                           |  |
| Time frame: past 36 months                                               |                                                                                                                                                                                |                                                                                                                                                                                                                                                                                                                                                                                                                                 |                                                                          |                                                                      |  |  |                                           |  |
| <b>2</b>                                                                 | Grants or contracts from any entity (if not indicated in item #1 above).                                                                                                       | <input type="checkbox"/> <b>None</b><br><table border="1" style="width: 100%; border-collapse: collapse; margin-top: 5px;"> <tr> <td style="width: 60%;">Alexion Pharaeutica<br/>Studies ( institutional and personal payment)PHRI</td> <td>Clinical</td> </tr> <tr> <td> </td> <td> </td> </tr> </table>                                                                                                                       | Alexion Pharaeutica<br>Studies ( institutional and personal payment)PHRI | Clinical                                                             |  |  |                                           |  |
| Alexion Pharaeutica<br>Studies ( institutional and personal payment)PHRI | Clinical                                                                                                                                                                       |                                                                                                                                                                                                                                                                                                                                                                                                                                 |                                                                          |                                                                      |  |  |                                           |  |
|                                                                          |                                                                                                                                                                                |                                                                                                                                                                                                                                                                                                                                                                                                                                 |                                                                          |                                                                      |  |  |                                           |  |
| <b>3</b>                                                                 | Royalties or licenses                                                                                                                                                          | <input checked="" type="checkbox"/> <b>None</b><br><table border="1" style="width: 100%; border-collapse: collapse; margin-top: 5px;"> <tr> <td> </td> <td> </td> </tr> <tr> <td> </td> <td> </td> </tr> </table>                                                                                                                                                                                                               |                                                                          |                                                                      |  |  |                                           |  |
|                                                                          |                                                                                                                                                                                |                                                                                                                                                                                                                                                                                                                                                                                                                                 |                                                                          |                                                                      |  |  |                                           |  |
|                                                                          |                                                                                                                                                                                |                                                                                                                                                                                                                                                                                                                                                                                                                                 |                                                                          |                                                                      |  |  |                                           |  |

|    |                                                                                                              | Name all entities with whom you have this relationship or indicate none (add rows as needed) | Specifications/Comments (e.g., if payments were made to you or to your institution) |
|----|--------------------------------------------------------------------------------------------------------------|----------------------------------------------------------------------------------------------|-------------------------------------------------------------------------------------|
| 4  | Consulting fees                                                                                              | <input type="checkbox"/> <b>None</b>                                                         |                                                                                     |
|    |                                                                                                              | Wilson Theraoethics                                                                          | Persona; payment                                                                    |
|    |                                                                                                              | Alexion PharmaceuticalsVIVET Therapeutics                                                    |                                                                                     |
|    |                                                                                                              | Univar                                                                                       |                                                                                     |
| 5  | Payment or honoraria for lectures, presentations, speakers bureaus, manuscript writing or educational events | <input checked="" type="checkbox"/> <b>None</b>                                              |                                                                                     |
|    |                                                                                                              | EVER Pharma                                                                                  | Lectures honoraria ( personal)                                                      |
|    |                                                                                                              |                                                                                              |                                                                                     |
| 6  | Payment for expert testimony                                                                                 | <input checked="" type="checkbox"/> <b>None</b>                                              |                                                                                     |
|    |                                                                                                              |                                                                                              |                                                                                     |
|    |                                                                                                              |                                                                                              |                                                                                     |
| 7  | Support for attending meetings and/or travel                                                                 | <input type="checkbox"/> <b>None</b>                                                         |                                                                                     |
|    |                                                                                                              | GMPO Orphan                                                                                  |                                                                                     |
|    |                                                                                                              | Aarhus Univesity                                                                             |                                                                                     |
|    |                                                                                                              | Angels Instiative                                                                            |                                                                                     |
| 8  | Patents planned, issued or pending                                                                           | <input checked="" type="checkbox"/> <b>None</b>                                              |                                                                                     |
|    |                                                                                                              |                                                                                              |                                                                                     |
|    |                                                                                                              |                                                                                              |                                                                                     |
| 9  | Participation on a Data Safety Monitoring Board or Advisory Board                                            | <input checked="" type="checkbox"/> <b>None</b>                                              |                                                                                     |
|    |                                                                                                              |                                                                                              |                                                                                     |
|    |                                                                                                              |                                                                                              |                                                                                     |
| 10 | Leadership or fiduciary role in other board, society, committee or advocacy group, paid or unpaid            | <input type="checkbox"/> <b>None</b>                                                         |                                                                                     |
|    |                                                                                                              | Honorary President of Polish Neurological Society                                            |                                                                                     |
|    |                                                                                                              |                                                                                              |                                                                                     |

|           |                                                                                  | Name all entities with whom you have this relationship or indicate none (add rows as needed)                                                                                                          | Specifications/Comments (e.g., if payments were made to you or to your institution) |  |  |  |  |  |  |
|-----------|----------------------------------------------------------------------------------|-------------------------------------------------------------------------------------------------------------------------------------------------------------------------------------------------------|-------------------------------------------------------------------------------------|--|--|--|--|--|--|
| <b>11</b> | Stock or stock options                                                           | <input checked="" type="checkbox"/> <b>None</b><br><table border="1" data-bbox="376 412 1490 510"> <tr><td> </td><td> </td></tr> <tr><td> </td><td> </td></tr> <tr><td> </td><td> </td></tr> </table> |                                                                                     |  |  |  |  |  |  |
|           |                                                                                  |                                                                                                                                                                                                       |                                                                                     |  |  |  |  |  |  |
|           |                                                                                  |                                                                                                                                                                                                       |                                                                                     |  |  |  |  |  |  |
|           |                                                                                  |                                                                                                                                                                                                       |                                                                                     |  |  |  |  |  |  |
| <b>12</b> | Receipt of equipment, materials, drugs, medical writing, gifts or other services | <input checked="" type="checkbox"/> <b>None</b><br><table border="1" data-bbox="376 622 1490 721"> <tr><td> </td><td> </td></tr> <tr><td> </td><td> </td></tr> <tr><td> </td><td> </td></tr> </table> |                                                                                     |  |  |  |  |  |  |
|           |                                                                                  |                                                                                                                                                                                                       |                                                                                     |  |  |  |  |  |  |
|           |                                                                                  |                                                                                                                                                                                                       |                                                                                     |  |  |  |  |  |  |
|           |                                                                                  |                                                                                                                                                                                                       |                                                                                     |  |  |  |  |  |  |
| <b>13</b> | Other financial or non-financial interests                                       | <input checked="" type="checkbox"/> <b>None</b><br><table border="1" data-bbox="376 833 1490 931"> <tr><td> </td><td> </td></tr> <tr><td> </td><td> </td></tr> <tr><td> </td><td> </td></tr> </table> |                                                                                     |  |  |  |  |  |  |
|           |                                                                                  |                                                                                                                                                                                                       |                                                                                     |  |  |  |  |  |  |
|           |                                                                                  |                                                                                                                                                                                                       |                                                                                     |  |  |  |  |  |  |
|           |                                                                                  |                                                                                                                                                                                                       |                                                                                     |  |  |  |  |  |  |

Please place an "X" next to the following statement to indicate your agreement:

I certify that I have answered every question and have not altered the wording of any of the questions on this form.

### ICMJE DISCLOSURE FORM

**Date:** 3/12/2024

**Your Name:** Gerald Denk

**Manuscript Title:** Non-ceruloplasmin copper and urinary copper in clinically stable Wilson Disease: Alignment with recommended targets and values in healthy persons

**Manuscript Number (if known):** JHEPR-D-23-01117

In the interest of transparency, we ask you to disclose all relationships/activities/interests listed below that are related to the content of your manuscript. "Related" means any relation with for-profit or not-for-profit third parties whose interests may be affected by the content of the manuscript. Disclosure represents a commitment to transparency and does not necessarily indicate a bias. If you are in doubt about whether to list a relationship/activity/interest, it is preferable that you do so.

The author's relationships/activities/interests should be defined broadly. For example, if your manuscript pertains to the epidemiology of hypertension, you should declare all relationships with manufacturers of antihypertensive medication, even if that medication is not mentioned in the manuscript.

In item #1 below, report all support for the work reported in this manuscript without time limit. For all other items, the time frame for disclosure is the past 36 months.

|                                                           |                                                                                                                                                                                | Name all entities with whom you have this relationship or indicate none (add rows as needed)                                                                             | Specifications/Comments (e.g., if payments were made to you or to your institution) |  |  |  |  |  |                                                          |
|-----------------------------------------------------------|--------------------------------------------------------------------------------------------------------------------------------------------------------------------------------|--------------------------------------------------------------------------------------------------------------------------------------------------------------------------|-------------------------------------------------------------------------------------|--|--|--|--|--|----------------------------------------------------------|
| <b>Time frame: Since the initial planning of the work</b> |                                                                                                                                                                                |                                                                                                                                                                          |                                                                                     |  |  |  |  |  |                                                          |
| <b>1</b>                                                  | All support for the present manuscript (e.g., funding, provision of study materials, medical writing, article processing charges, etc.)<br><b>No time limit for this item.</b> | <input checked="" type="checkbox"/> <b>None</b>                                                                                                                          |                                                                                     |  |  |  |  |  |                                                          |
|                                                           |                                                                                                                                                                                | <table border="1" style="width: 100%;"><tr><td style="width: 50%;"></td><td style="width: 50%;"></td></tr><tr><td></td><td></td></tr><tr><td></td><td></td></tr></table> |                                                                                     |  |  |  |  |  | <small>Click the tab key to add additional rows.</small> |
|                                                           |                                                                                                                                                                                |                                                                                                                                                                          |                                                                                     |  |  |  |  |  |                                                          |
|                                                           |                                                                                                                                                                                |                                                                                                                                                                          |                                                                                     |  |  |  |  |  |                                                          |
|                                                           |                                                                                                                                                                                |                                                                                                                                                                          |                                                                                     |  |  |  |  |  |                                                          |
| <b>Time frame: past 36 months</b>                         |                                                                                                                                                                                |                                                                                                                                                                          |                                                                                     |  |  |  |  |  |                                                          |
| <b>2</b>                                                  | Grants or contracts from any entity (if not indicated in item #1 above).                                                                                                       | <input checked="" type="checkbox"/> <b>None</b>                                                                                                                          |                                                                                     |  |  |  |  |  |                                                          |
|                                                           |                                                                                                                                                                                | <table border="1" style="width: 100%;"><tr><td style="width: 50%;"></td><td style="width: 50%;"></td></tr><tr><td></td><td></td></tr><tr><td></td><td></td></tr></table> |                                                                                     |  |  |  |  |  |                                                          |
|                                                           |                                                                                                                                                                                |                                                                                                                                                                          |                                                                                     |  |  |  |  |  |                                                          |
|                                                           |                                                                                                                                                                                |                                                                                                                                                                          |                                                                                     |  |  |  |  |  |                                                          |
|                                                           |                                                                                                                                                                                |                                                                                                                                                                          |                                                                                     |  |  |  |  |  |                                                          |
| <b>3</b>                                                  | Royalties or licenses                                                                                                                                                          | <input checked="" type="checkbox"/> <b>None</b>                                                                                                                          |                                                                                     |  |  |  |  |  |                                                          |
|                                                           |                                                                                                                                                                                | <table border="1" style="width: 100%;"><tr><td style="width: 50%;"></td><td style="width: 50%;"></td></tr><tr><td></td><td></td></tr><tr><td></td><td></td></tr></table> |                                                                                     |  |  |  |  |  |                                                          |
|                                                           |                                                                                                                                                                                |                                                                                                                                                                          |                                                                                     |  |  |  |  |  |                                                          |
|                                                           |                                                                                                                                                                                |                                                                                                                                                                          |                                                                                     |  |  |  |  |  |                                                          |
|                                                           |                                                                                                                                                                                |                                                                                                                                                                          |                                                                                     |  |  |  |  |  |                                                          |

|                                            |                                                                                                              | Name all entities with whom you have this relationship or indicate none (add rows as needed)                                                                                                                      | Specifications/Comments (e.g., if payments were made to you or to your institution) |                |  |  |  |  |  |
|--------------------------------------------|--------------------------------------------------------------------------------------------------------------|-------------------------------------------------------------------------------------------------------------------------------------------------------------------------------------------------------------------|-------------------------------------------------------------------------------------|----------------|--|--|--|--|--|
| 4                                          | Consulting fees                                                                                              | <input type="checkbox"/> None<br><table border="1"> <tr> <td>Univar, Orphalan, Alexion (Advisory Board)</td> <td>Advisory Board</td> </tr> <tr> <td></td> <td></td> </tr> <tr> <td></td> <td></td> </tr> </table> | Univar, Orphalan, Alexion (Advisory Board)                                          | Advisory Board |  |  |  |  |  |
| Univar, Orphalan, Alexion (Advisory Board) | Advisory Board                                                                                               |                                                                                                                                                                                                                   |                                                                                     |                |  |  |  |  |  |
|                                            |                                                                                                              |                                                                                                                                                                                                                   |                                                                                     |                |  |  |  |  |  |
|                                            |                                                                                                              |                                                                                                                                                                                                                   |                                                                                     |                |  |  |  |  |  |
| 5                                          | Payment or honoraria for lectures, presentations, speakers bureaus, manuscript writing or educational events | <input type="checkbox"/> None<br><table border="1"> <tr> <td>Orphalan</td> <td>Lecture fees</td> </tr> <tr> <td></td> <td></td> </tr> </table>                                                                    | Orphalan                                                                            | Lecture fees   |  |  |  |  |  |
| Orphalan                                   | Lecture fees                                                                                                 |                                                                                                                                                                                                                   |                                                                                     |                |  |  |  |  |  |
|                                            |                                                                                                              |                                                                                                                                                                                                                   |                                                                                     |                |  |  |  |  |  |
| 6                                          | Payment for expert testimony                                                                                 | <input checked="" type="checkbox"/> None<br><table border="1"> <tr> <td></td> <td></td> </tr> <tr> <td></td> <td></td> </tr> </table>                                                                             |                                                                                     |                |  |  |  |  |  |
|                                            |                                                                                                              |                                                                                                                                                                                                                   |                                                                                     |                |  |  |  |  |  |
|                                            |                                                                                                              |                                                                                                                                                                                                                   |                                                                                     |                |  |  |  |  |  |
| 7                                          | Support for attending meetings and/or travel                                                                 | <input checked="" type="checkbox"/> None<br><table border="1"> <tr> <td></td> <td></td> </tr> <tr> <td></td> <td></td> </tr> </table>                                                                             |                                                                                     |                |  |  |  |  |  |
|                                            |                                                                                                              |                                                                                                                                                                                                                   |                                                                                     |                |  |  |  |  |  |
|                                            |                                                                                                              |                                                                                                                                                                                                                   |                                                                                     |                |  |  |  |  |  |
| 8                                          | Patents planned, issued or pending                                                                           | <input checked="" type="checkbox"/> None<br><table border="1"> <tr> <td></td> <td></td> </tr> <tr> <td></td> <td></td> </tr> </table>                                                                             |                                                                                     |                |  |  |  |  |  |
|                                            |                                                                                                              |                                                                                                                                                                                                                   |                                                                                     |                |  |  |  |  |  |
|                                            |                                                                                                              |                                                                                                                                                                                                                   |                                                                                     |                |  |  |  |  |  |
| 9                                          | Participation on a Data Safety Monitoring Board or Advisory Board                                            | <input checked="" type="checkbox"/> None<br><table border="1"> <tr> <td></td> <td></td> </tr> <tr> <td></td> <td></td> </tr> </table>                                                                             |                                                                                     |                |  |  |  |  |  |
|                                            |                                                                                                              |                                                                                                                                                                                                                   |                                                                                     |                |  |  |  |  |  |
|                                            |                                                                                                              |                                                                                                                                                                                                                   |                                                                                     |                |  |  |  |  |  |
| 10                                         | Leadership or fiduciary role in other board, society, committee or advocacy group, paid or unpaid            | <input checked="" type="checkbox"/> None<br><table border="1"> <tr> <td></td> <td></td> </tr> <tr> <td></td> <td></td> </tr> </table>                                                                             |                                                                                     |                |  |  |  |  |  |
|                                            |                                                                                                              |                                                                                                                                                                                                                   |                                                                                     |                |  |  |  |  |  |
|                                            |                                                                                                              |                                                                                                                                                                                                                   |                                                                                     |                |  |  |  |  |  |

|    |                                                                                  | Name all entities with whom you have this relationship or indicate none (add rows as needed)                                                                                                   | Specifications/Comments (e.g., if payments were made to you or to your institution) |  |  |  |  |  |  |
|----|----------------------------------------------------------------------------------|------------------------------------------------------------------------------------------------------------------------------------------------------------------------------------------------|-------------------------------------------------------------------------------------|--|--|--|--|--|--|
| 11 | Stock or stock options                                                           | <input checked="" type="checkbox"/> None<br><table border="1" data-bbox="376 412 1490 510"> <tr><td> </td><td> </td></tr> <tr><td> </td><td> </td></tr> <tr><td> </td><td> </td></tr> </table> |                                                                                     |  |  |  |  |  |  |
|    |                                                                                  |                                                                                                                                                                                                |                                                                                     |  |  |  |  |  |  |
|    |                                                                                  |                                                                                                                                                                                                |                                                                                     |  |  |  |  |  |  |
|    |                                                                                  |                                                                                                                                                                                                |                                                                                     |  |  |  |  |  |  |
| 12 | Receipt of equipment, materials, drugs, medical writing, gifts or other services | <input checked="" type="checkbox"/> None<br><table border="1" data-bbox="376 622 1490 721"> <tr><td> </td><td> </td></tr> <tr><td> </td><td> </td></tr> <tr><td> </td><td> </td></tr> </table> |                                                                                     |  |  |  |  |  |  |
|    |                                                                                  |                                                                                                                                                                                                |                                                                                     |  |  |  |  |  |  |
|    |                                                                                  |                                                                                                                                                                                                |                                                                                     |  |  |  |  |  |  |
|    |                                                                                  |                                                                                                                                                                                                |                                                                                     |  |  |  |  |  |  |
| 13 | Other financial or non-financial interests                                       | <input checked="" type="checkbox"/> None<br><table border="1" data-bbox="376 833 1490 931"> <tr><td> </td><td> </td></tr> <tr><td> </td><td> </td></tr> <tr><td> </td><td> </td></tr> </table> |                                                                                     |  |  |  |  |  |  |
|    |                                                                                  |                                                                                                                                                                                                |                                                                                     |  |  |  |  |  |  |
|    |                                                                                  |                                                                                                                                                                                                |                                                                                     |  |  |  |  |  |  |
|    |                                                                                  |                                                                                                                                                                                                |                                                                                     |  |  |  |  |  |  |

Please place an "X" next to the following statement to indicate your agreement:

I certify that I have answered every question and have not altered the wording of any of the questions on this form.



ICMJE DISCLOSURE FORM

Date: Click or tap to enter a date. Renata D'Inca  
 Your Name: Click or tap here to enter text. March 20th 2024  
 Manuscript Title: Non-ceruloplasmin copper and urinary copper in clinically stable Wilson Disease: Alignment with recommended targets and values in healthy persons  
 Manuscript Number (if known): JHEPR-D-23-01117

In the interest of transparency, we ask you to disclose all relationships/activities/interests listed below that are related to the content of your manuscript. "Related" means any relation with for-profit or not-for-profit third parties whose interests may be affected by the content of the manuscript. Disclosure represents a commitment to transparency and does not necessarily indicate a bias. If you are in doubt about whether to list a relationship/activity/interest, it is preferable that you do so.

The author's relationships/activities/interests should be defined broadly. For example, if your manuscript pertains to the epidemiology of hypertension, you should declare all relationships with manufacturers of antihypertensive medication, even if that medication is not mentioned in the manuscript.

In item #1 below, report all support for the work reported in this manuscript without time limit. For all other items, the time frame for disclosure is the past 36 months.

|                                                           |                                                                                                                                                                                | Name all entities with whom you have this relationship or indicate none (add rows as needed) | Specifications/Comments (e.g., if payments were made to you or to your institution) |
|-----------------------------------------------------------|--------------------------------------------------------------------------------------------------------------------------------------------------------------------------------|----------------------------------------------------------------------------------------------|-------------------------------------------------------------------------------------|
| <b>Time frame: Since the initial planning of the work</b> |                                                                                                                                                                                |                                                                                              |                                                                                     |
| 1                                                         | All support for the present manuscript (e.g., funding, provision of study materials, medical writing, article processing charges, etc.)<br><b>No time limit for this item.</b> | <input checked="" type="checkbox"/> None                                                     |                                                                                     |
| <b>Time frame: past 36 months</b>                         |                                                                                                                                                                                |                                                                                              |                                                                                     |
| 2                                                         | Grants or contracts from any entity (if not indicated in item #1 above).                                                                                                       | <input checked="" type="checkbox"/> None                                                     |                                                                                     |
| 3                                                         | Royalties or licenses                                                                                                                                                          | <input checked="" type="checkbox"/> None                                                     |                                                                                     |
| 4                                                         | Consulting fees                                                                                                                                                                | <input checked="" type="checkbox"/> None                                                     |                                                                                     |
| 112/13/2021 ICMJE Disclosure Form                         |                                                                                                                                                                                |                                                                                              |                                                                                     |

*Renata D'Inca*

|    |                                                                                                              |                                                                                                                                                             |  |  |  |  |  |  |
|----|--------------------------------------------------------------------------------------------------------------|-------------------------------------------------------------------------------------------------------------------------------------------------------------|--|--|--|--|--|--|
|    |                                                                                                              |                                                                                                                                                             |  |  |  |  |  |  |
| 5  | Payment or honoraria for lectures, presentations, speakers bureaus, manuscript writing or educational events | <input checked="" type="checkbox"/> None<br><table border="1"> <tr><td></td><td></td></tr> <tr><td></td><td></td></tr> <tr><td></td><td></td></tr> </table> |  |  |  |  |  |  |
|    |                                                                                                              |                                                                                                                                                             |  |  |  |  |  |  |
|    |                                                                                                              |                                                                                                                                                             |  |  |  |  |  |  |
|    |                                                                                                              |                                                                                                                                                             |  |  |  |  |  |  |
| 6  | Payment for expert testimony                                                                                 | <input checked="" type="checkbox"/> None<br><table border="1"> <tr><td></td><td></td></tr> <tr><td></td><td></td></tr> <tr><td></td><td></td></tr> </table> |  |  |  |  |  |  |
|    |                                                                                                              |                                                                                                                                                             |  |  |  |  |  |  |
|    |                                                                                                              |                                                                                                                                                             |  |  |  |  |  |  |
|    |                                                                                                              |                                                                                                                                                             |  |  |  |  |  |  |
| 7  | Support for attending meetings and/or travel                                                                 | <input checked="" type="checkbox"/> None<br><table border="1"> <tr><td></td><td></td></tr> <tr><td></td><td></td></tr> <tr><td></td><td></td></tr> </table> |  |  |  |  |  |  |
|    |                                                                                                              |                                                                                                                                                             |  |  |  |  |  |  |
|    |                                                                                                              |                                                                                                                                                             |  |  |  |  |  |  |
|    |                                                                                                              |                                                                                                                                                             |  |  |  |  |  |  |
| 8  | Patents planned, issued or pending                                                                           | <input checked="" type="checkbox"/> None<br><table border="1"> <tr><td></td><td></td></tr> <tr><td></td><td></td></tr> <tr><td></td><td></td></tr> </table> |  |  |  |  |  |  |
|    |                                                                                                              |                                                                                                                                                             |  |  |  |  |  |  |
|    |                                                                                                              |                                                                                                                                                             |  |  |  |  |  |  |
|    |                                                                                                              |                                                                                                                                                             |  |  |  |  |  |  |
| 9  | Participation on a Data Safety Monitoring Board or Advisory Board                                            | <input checked="" type="checkbox"/> None<br><table border="1"> <tr><td></td><td></td></tr> <tr><td></td><td></td></tr> <tr><td></td><td></td></tr> </table> |  |  |  |  |  |  |
|    |                                                                                                              |                                                                                                                                                             |  |  |  |  |  |  |
|    |                                                                                                              |                                                                                                                                                             |  |  |  |  |  |  |
|    |                                                                                                              |                                                                                                                                                             |  |  |  |  |  |  |
| 10 | Leadership or fiduciary role in other board, society, committee or advocacy group, paid or unpaid            | <input checked="" type="checkbox"/> None<br><table border="1"> <tr><td></td><td></td></tr> <tr><td></td><td></td></tr> <tr><td></td><td></td></tr> </table> |  |  |  |  |  |  |
|    |                                                                                                              |                                                                                                                                                             |  |  |  |  |  |  |
|    |                                                                                                              |                                                                                                                                                             |  |  |  |  |  |  |
|    |                                                                                                              |                                                                                                                                                             |  |  |  |  |  |  |
| 11 | Stock or stock options                                                                                       | <input checked="" type="checkbox"/> None<br><table border="1"> <tr><td></td><td></td></tr> <tr><td></td><td></td></tr> <tr><td></td><td></td></tr> </table> |  |  |  |  |  |  |
|    |                                                                                                              |                                                                                                                                                             |  |  |  |  |  |  |
|    |                                                                                                              |                                                                                                                                                             |  |  |  |  |  |  |
|    |                                                                                                              |                                                                                                                                                             |  |  |  |  |  |  |

212/13/2021ICMJE Disclosure Form

losure Form

*D. Reese*

|    |                                                                                  |                                          |                                                                                                                   |  |  |  |  |  |  |
|----|----------------------------------------------------------------------------------|------------------------------------------|-------------------------------------------------------------------------------------------------------------------|--|--|--|--|--|--|
| 12 | Receipt of equipment, materials, drugs, medical writing, gifts or other services | None                                     |                                                                                                                   |  |  |  |  |  |  |
| 13 | Other financial or non-financial interests                                       | <input checked="" type="checkbox"/> None | <table border="1"><tr><td> </td><td> </td></tr><tr><td> </td><td> </td></tr><tr><td> </td><td> </td></tr></table> |  |  |  |  |  |  |
|    |                                                                                  |                                          |                                                                                                                   |  |  |  |  |  |  |
|    |                                                                                  |                                          |                                                                                                                   |  |  |  |  |  |  |
|    |                                                                                  |                                          |                                                                                                                   |  |  |  |  |  |  |

Please place an "X" next to the following statement to indicate your agreement:

I certify that I have answered every question and have not altered the wording of any of the questions on this form.

*R. P. Lucas*

### ICMJE DISCLOSURE FORM

Date: Click or tap to enter a date. March 13th 2024

Your Name: Click or tap here to enter text. Francisco de Assiss Gondim

Manuscript Title: Non-ceruloplasmin copper and urinary copper in clinically stable Wilson Disease: Alignment with recommended targets and values in healthy persons

Manuscript Number (if known): JHEPR-D-23-01117

In the interest of transparency, we ask you to disclose all relationships/activities/interests listed below that are related to the content of your manuscript. "Related" means any relation with for-profit or not-for-profit third parties whose interests may be affected by the content of the manuscript. Disclosure represents a commitment to transparency and does not necessarily indicate a bias. If you are in doubt about whether to list a relationship/activity/interest, it is preferable that you do so.

The author's relationships/activities/interests should be defined broadly. For example, if your manuscript pertains to the epidemiology of hypertension, you should declare all relationships with manufacturers of antihypertensive medication, even if that medication is not mentioned in the manuscript.

In item #1 below, report all support for the work reported in this manuscript without time limit. For all other items, the time frame for disclosure is the past 36 months.

|                                                    | Name all entities with whom you have this relationship or indicate none (add rows as needed)                                                                           | Specifications/Comments (e.g., if payments were made to you or to your institution) |  |  |  |                                                                                                                            |  |  |  |  |
|----------------------------------------------------|------------------------------------------------------------------------------------------------------------------------------------------------------------------------|-------------------------------------------------------------------------------------|--|--|--|----------------------------------------------------------------------------------------------------------------------------|--|--|--|--|
| Time frame: Since the initial planning of the work |                                                                                                                                                                        |                                                                                     |  |  |  |                                                                                                                            |  |  |  |  |
| 1                                                  | <input checked="" type="checkbox"/> None<br><table border="1" style="width: 100%; height: 40px;"> <tr><td> </td><td> </td></tr> <tr><td> </td><td> </td></tr> </table> |                                                                                     |  |  |  | <table border="1" style="width: 100%; height: 40px;"> <tr><td> </td><td> </td></tr> <tr><td> </td><td> </td></tr> </table> |  |  |  |  |
|                                                    |                                                                                                                                                                        |                                                                                     |  |  |  |                                                                                                                            |  |  |  |  |
|                                                    |                                                                                                                                                                        |                                                                                     |  |  |  |                                                                                                                            |  |  |  |  |
|                                                    |                                                                                                                                                                        |                                                                                     |  |  |  |                                                                                                                            |  |  |  |  |
|                                                    |                                                                                                                                                                        |                                                                                     |  |  |  |                                                                                                                            |  |  |  |  |
| Time frame: past 36 months                         |                                                                                                                                                                        |                                                                                     |  |  |  |                                                                                                                            |  |  |  |  |
| 2                                                  | <input checked="" type="checkbox"/> None<br><table border="1" style="width: 100%; height: 40px;"> <tr><td> </td><td> </td></tr> <tr><td> </td><td> </td></tr> </table> |                                                                                     |  |  |  | <table border="1" style="width: 100%; height: 40px;"> <tr><td> </td><td> </td></tr> <tr><td> </td><td> </td></tr> </table> |  |  |  |  |
|                                                    |                                                                                                                                                                        |                                                                                     |  |  |  |                                                                                                                            |  |  |  |  |
|                                                    |                                                                                                                                                                        |                                                                                     |  |  |  |                                                                                                                            |  |  |  |  |
|                                                    |                                                                                                                                                                        |                                                                                     |  |  |  |                                                                                                                            |  |  |  |  |
|                                                    |                                                                                                                                                                        |                                                                                     |  |  |  |                                                                                                                            |  |  |  |  |
| 3                                                  | <input checked="" type="checkbox"/> None<br><table border="1" style="width: 100%; height: 40px;"> <tr><td> </td><td> </td></tr> <tr><td> </td><td> </td></tr> </table> |                                                                                     |  |  |  | <table border="1" style="width: 100%; height: 40px;"> <tr><td> </td><td> </td></tr> <tr><td> </td><td> </td></tr> </table> |  |  |  |  |
|                                                    |                                                                                                                                                                        |                                                                                     |  |  |  |                                                                                                                            |  |  |  |  |
|                                                    |                                                                                                                                                                        |                                                                                     |  |  |  |                                                                                                                            |  |  |  |  |
|                                                    |                                                                                                                                                                        |                                                                                     |  |  |  |                                                                                                                            |  |  |  |  |
|                                                    |                                                                                                                                                                        |                                                                                     |  |  |  |                                                                                                                            |  |  |  |  |

12/13/2021



ICMJE Disclosure Form



|    |                                                                                                              | Name all entities with whom you have this relationship or indicate none (add rows as needed)                                                            | Specifications/Comments (e.g., if payments were made to you or to your institution) |  |  |  |  |  |  |
|----|--------------------------------------------------------------------------------------------------------------|---------------------------------------------------------------------------------------------------------------------------------------------------------|-------------------------------------------------------------------------------------|--|--|--|--|--|--|
| 4  | Consulting fees                                                                                              | <input checked="" type="checkbox"/> None<br><table border="1"><tr><td></td><td></td></tr><tr><td></td><td></td></tr><tr><td></td><td></td></tr></table> |                                                                                     |  |  |  |  |  |  |
|    |                                                                                                              |                                                                                                                                                         |                                                                                     |  |  |  |  |  |  |
|    |                                                                                                              |                                                                                                                                                         |                                                                                     |  |  |  |  |  |  |
|    |                                                                                                              |                                                                                                                                                         |                                                                                     |  |  |  |  |  |  |
| 5  | Payment or honoraria for lectures, presentations, speakers bureaus, manuscript writing or educational events | <input checked="" type="checkbox"/> None<br><table border="1"><tr><td></td><td></td></tr><tr><td></td><td></td></tr><tr><td></td><td></td></tr></table> |                                                                                     |  |  |  |  |  |  |
|    |                                                                                                              |                                                                                                                                                         |                                                                                     |  |  |  |  |  |  |
|    |                                                                                                              |                                                                                                                                                         |                                                                                     |  |  |  |  |  |  |
|    |                                                                                                              |                                                                                                                                                         |                                                                                     |  |  |  |  |  |  |
| 6  | Payment for expert testimony                                                                                 | <input checked="" type="checkbox"/> None<br><table border="1"><tr><td></td><td></td></tr><tr><td></td><td></td></tr><tr><td></td><td></td></tr></table> |                                                                                     |  |  |  |  |  |  |
|    |                                                                                                              |                                                                                                                                                         |                                                                                     |  |  |  |  |  |  |
|    |                                                                                                              |                                                                                                                                                         |                                                                                     |  |  |  |  |  |  |
|    |                                                                                                              |                                                                                                                                                         |                                                                                     |  |  |  |  |  |  |
| 7  | Support for attending meetings and/or travel                                                                 | <input checked="" type="checkbox"/> None<br><table border="1"><tr><td></td><td></td></tr><tr><td></td><td></td></tr><tr><td></td><td></td></tr></table> |                                                                                     |  |  |  |  |  |  |
|    |                                                                                                              |                                                                                                                                                         |                                                                                     |  |  |  |  |  |  |
|    |                                                                                                              |                                                                                                                                                         |                                                                                     |  |  |  |  |  |  |
|    |                                                                                                              |                                                                                                                                                         |                                                                                     |  |  |  |  |  |  |
| 8  | Patents planned, issued or pending                                                                           | <input checked="" type="checkbox"/> None<br><table border="1"><tr><td></td><td></td></tr><tr><td></td><td></td></tr><tr><td></td><td></td></tr></table> |                                                                                     |  |  |  |  |  |  |
|    |                                                                                                              |                                                                                                                                                         |                                                                                     |  |  |  |  |  |  |
|    |                                                                                                              |                                                                                                                                                         |                                                                                     |  |  |  |  |  |  |
|    |                                                                                                              |                                                                                                                                                         |                                                                                     |  |  |  |  |  |  |
| 9  | Participation on a Data Safety Monitoring Board or Advisory Board                                            | <input checked="" type="checkbox"/> None<br><table border="1"><tr><td></td><td></td></tr><tr><td></td><td></td></tr><tr><td></td><td></td></tr></table> |                                                                                     |  |  |  |  |  |  |
|    |                                                                                                              |                                                                                                                                                         |                                                                                     |  |  |  |  |  |  |
|    |                                                                                                              |                                                                                                                                                         |                                                                                     |  |  |  |  |  |  |
|    |                                                                                                              |                                                                                                                                                         |                                                                                     |  |  |  |  |  |  |
| 10 | Leadership or fiduciary role in other board, society, committee or advocacy group, paid or unpaid            | <input checked="" type="checkbox"/> None<br><table border="1"><tr><td></td><td></td></tr><tr><td></td><td></td></tr><tr><td></td><td></td></tr></table> |                                                                                     |  |  |  |  |  |  |
|    |                                                                                                              |                                                                                                                                                         |                                                                                     |  |  |  |  |  |  |
|    |                                                                                                              |                                                                                                                                                         |                                                                                     |  |  |  |  |  |  |
|    |                                                                                                              |                                                                                                                                                         |                                                                                     |  |  |  |  |  |  |

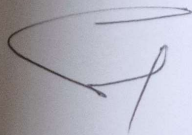

12/13/2021

ICMJE Disclosure Form

|    | Name all entities with whom you have this relationship or indicate none (add rows as needed) | Specifications/Comments (e.g., if payments were made to you or to your institution)                                                                     |  |  |  |  |  |  |
|----|----------------------------------------------------------------------------------------------|---------------------------------------------------------------------------------------------------------------------------------------------------------|--|--|--|--|--|--|
| 11 | Stock or stock options                                                                       | <input checked="" type="checkbox"/> None<br><table border="1"><tr><td></td><td></td></tr><tr><td></td><td></td></tr><tr><td></td><td></td></tr></table> |  |  |  |  |  |  |
|    |                                                                                              |                                                                                                                                                         |  |  |  |  |  |  |
|    |                                                                                              |                                                                                                                                                         |  |  |  |  |  |  |
|    |                                                                                              |                                                                                                                                                         |  |  |  |  |  |  |
| 12 | Receipt of equipment, materials, drugs, medical writing, gifts or other services             | <input checked="" type="checkbox"/> None<br><table border="1"><tr><td></td><td></td></tr><tr><td></td><td></td></tr><tr><td></td><td></td></tr></table> |  |  |  |  |  |  |
|    |                                                                                              |                                                                                                                                                         |  |  |  |  |  |  |
|    |                                                                                              |                                                                                                                                                         |  |  |  |  |  |  |
|    |                                                                                              |                                                                                                                                                         |  |  |  |  |  |  |
| 13 | Other financial or non-financial interests                                                   | <input checked="" type="checkbox"/> None<br><table border="1"><tr><td></td><td></td></tr><tr><td></td><td></td></tr><tr><td></td><td></td></tr></table> |  |  |  |  |  |  |
|    |                                                                                              |                                                                                                                                                         |  |  |  |  |  |  |
|    |                                                                                              |                                                                                                                                                         |  |  |  |  |  |  |
|    |                                                                                              |                                                                                                                                                         |  |  |  |  |  |  |

Please place an "X" next to the following statement to indicate your agreement:

I certify that I have answered every question and have not altered the wording of any of the questions on this form.



Francis Gordon, M.D.

3/12/2024

### ICMJE DISCLOSURE FORM

**Date:** 3/19/2024

**Your Name:** Dr Joanna Moore

**Manuscript Title:** Non-ceruloplasmin copper and urinary copper in clinically stable Wilson Disease: Alignment with recommended targets and values in healthy persons

**Manuscript Number (if known):** JHEPR-D-23-01117

In the interest of transparency, we ask you to disclose all relationships/activities/interests listed below that are related to the content of your manuscript. "Related" means any relation with for-profit or not-for-profit third parties whose interests may be affected by the content of the manuscript. Disclosure represents a commitment to transparency and does not necessarily indicate a bias. If you are in doubt about whether to list a relationship/activity/interest, it is preferable that you do so.

The author's relationships/activities/interests should be defined broadly. For example, if your manuscript pertains to the epidemiology of hypertension, you should declare all relationships with manufacturers of antihypertensive medication, even if that medication is not mentioned in the manuscript.

In item #1 below, report all support for the work reported in this manuscript without time limit. For all other items, the time frame for disclosure is the past 36 months.

|                                                    | Name all entities with whom you have this relationship or indicate none (add rows as needed)                                                                                   | Specifications/Comments (e.g., if payments were made to you or to your institution)                                                                                                                                                                                                                                                                           |  |  |  |  |  |  |
|----------------------------------------------------|--------------------------------------------------------------------------------------------------------------------------------------------------------------------------------|---------------------------------------------------------------------------------------------------------------------------------------------------------------------------------------------------------------------------------------------------------------------------------------------------------------------------------------------------------------|--|--|--|--|--|--|
| Time frame: Since the initial planning of the work |                                                                                                                                                                                |                                                                                                                                                                                                                                                                                                                                                               |  |  |  |  |  |  |
| <b>1</b>                                           | All support for the present manuscript (e.g., funding, provision of study materials, medical writing, article processing charges, etc.)<br><b>No time limit for this item.</b> | <input checked="" type="checkbox"/> <b>None</b><br><table border="1" style="width: 100%; height: 40px; margin-top: 5px;"> <tr><td style="width: 60%;"></td><td></td></tr> <tr><td></td><td></td></tr> <tr><td></td><td></td></tr> </table> <div style="text-align: right; font-size: small; margin-top: 5px;">Click the tab key to add additional rows.</div> |  |  |  |  |  |  |
|                                                    |                                                                                                                                                                                |                                                                                                                                                                                                                                                                                                                                                               |  |  |  |  |  |  |
|                                                    |                                                                                                                                                                                |                                                                                                                                                                                                                                                                                                                                                               |  |  |  |  |  |  |
|                                                    |                                                                                                                                                                                |                                                                                                                                                                                                                                                                                                                                                               |  |  |  |  |  |  |
| Time frame: past 36 months                         |                                                                                                                                                                                |                                                                                                                                                                                                                                                                                                                                                               |  |  |  |  |  |  |
| <b>2</b>                                           | Grants or contracts from any entity (if not indicated in item #1 above).                                                                                                       | <input checked="" type="checkbox"/> <b>None</b><br><table border="1" style="width: 100%; height: 40px; margin-top: 5px;"> <tr><td style="width: 60%;"></td><td></td></tr> <tr><td></td><td></td></tr> <tr><td></td><td></td></tr> </table>                                                                                                                    |  |  |  |  |  |  |
|                                                    |                                                                                                                                                                                |                                                                                                                                                                                                                                                                                                                                                               |  |  |  |  |  |  |
|                                                    |                                                                                                                                                                                |                                                                                                                                                                                                                                                                                                                                                               |  |  |  |  |  |  |
|                                                    |                                                                                                                                                                                |                                                                                                                                                                                                                                                                                                                                                               |  |  |  |  |  |  |
| <b>3</b>                                           | Royalties or licenses                                                                                                                                                          | <input checked="" type="checkbox"/> <b>None</b><br><table border="1" style="width: 100%; height: 40px; margin-top: 5px;"> <tr><td style="width: 60%;"></td><td></td></tr> <tr><td></td><td></td></tr> <tr><td></td><td></td></tr> </table>                                                                                                                    |  |  |  |  |  |  |
|                                                    |                                                                                                                                                                                |                                                                                                                                                                                                                                                                                                                                                               |  |  |  |  |  |  |
|                                                    |                                                                                                                                                                                |                                                                                                                                                                                                                                                                                                                                                               |  |  |  |  |  |  |
|                                                    |                                                                                                                                                                                |                                                                                                                                                                                                                                                                                                                                                               |  |  |  |  |  |  |

|    |                                                                                                              | Name all entities with whom you have this relationship or indicate none (add rows as needed) | Specifications/Comments (e.g., if payments were made to you or to your institution) |
|----|--------------------------------------------------------------------------------------------------------------|----------------------------------------------------------------------------------------------|-------------------------------------------------------------------------------------|
| 4  | Consulting fees                                                                                              | <input type="checkbox"/> None                                                                |                                                                                     |
|    |                                                                                                              | Orphalan                                                                                     | Made to me. Not continuing                                                          |
|    |                                                                                                              | Alexion                                                                                      | Made to me. Not continuing                                                          |
|    |                                                                                                              |                                                                                              |                                                                                     |
| 5  | Payment or honoraria for lectures, presentations, speakers bureaus, manuscript writing or educational events | <input checked="" type="checkbox"/> None                                                     |                                                                                     |
|    |                                                                                                              |                                                                                              |                                                                                     |
|    |                                                                                                              |                                                                                              |                                                                                     |
|    |                                                                                                              |                                                                                              |                                                                                     |
| 6  | Payment for expert testimony                                                                                 | <input checked="" type="checkbox"/> None                                                     |                                                                                     |
|    |                                                                                                              |                                                                                              |                                                                                     |
|    |                                                                                                              |                                                                                              |                                                                                     |
|    |                                                                                                              |                                                                                              |                                                                                     |
| 7  | Support for attending meetings and/or travel                                                                 | <input checked="" type="checkbox"/> None                                                     |                                                                                     |
|    |                                                                                                              |                                                                                              |                                                                                     |
|    |                                                                                                              |                                                                                              |                                                                                     |
|    |                                                                                                              |                                                                                              |                                                                                     |
| 8  | Patents planned, issued or pending                                                                           | <input checked="" type="checkbox"/> None                                                     |                                                                                     |
|    |                                                                                                              |                                                                                              |                                                                                     |
|    |                                                                                                              |                                                                                              |                                                                                     |
|    |                                                                                                              |                                                                                              |                                                                                     |
| 9  | Participation on a Data Safety Monitoring Board or Advisory Board                                            | <input type="checkbox"/> None                                                                |                                                                                     |
|    |                                                                                                              | MAIL trial DMC representative                                                                | Not related to this paper                                                           |
|    |                                                                                                              |                                                                                              |                                                                                     |
|    |                                                                                                              |                                                                                              |                                                                                     |
| 10 | Leadership or fiduciary role in other board, society, committee or advocacy group, paid or unpaid            | <input checked="" type="checkbox"/> None                                                     |                                                                                     |
|    |                                                                                                              |                                                                                              |                                                                                     |
|    |                                                                                                              |                                                                                              |                                                                                     |
|    |                                                                                                              |                                                                                              |                                                                                     |



|    |                                                                                  | Name all entities with whom you have this relationship or indicate none (add rows as needed) | Specifications/Comments (e.g., if payments were made to you or to your institution) |
|----|----------------------------------------------------------------------------------|----------------------------------------------------------------------------------------------|-------------------------------------------------------------------------------------|
| 11 | Stock or stock options                                                           | <input checked="" type="checkbox"/> None                                                     |                                                                                     |
|    |                                                                                  |                                                                                              |                                                                                     |
|    |                                                                                  |                                                                                              |                                                                                     |
|    |                                                                                  |                                                                                              |                                                                                     |
| 12 | Receipt of equipment, materials, drugs, medical writing, gifts or other services | <input checked="" type="checkbox"/> None                                                     |                                                                                     |
|    |                                                                                  |                                                                                              |                                                                                     |
|    |                                                                                  |                                                                                              |                                                                                     |
|    |                                                                                  |                                                                                              |                                                                                     |
| 13 | Other financial or non-financial interests                                       | <input checked="" type="checkbox"/> None                                                     |                                                                                     |
|    |                                                                                  |                                                                                              |                                                                                     |
|    |                                                                                  |                                                                                              |                                                                                     |
|    |                                                                                  |                                                                                              |                                                                                     |

Please place an "X" next to the following statement to indicate your agreement:

I certify that I have answered every question and have not altered the wording of any of the questions on this form.

### ICMJE DISCLOSURE FORM

**Date:** 3/12/2024

**Your Name:** POUJOIS Aurélia

**Manuscript Title:** Non-ceruloplasmin copper and urinary copper in clinically stable Wilson Disease: Alignment with recommended targets and values in healthy persons

**Manuscript Number (if known):** JHEPR-D-23-01117

In the interest of transparency, we ask you to disclose all relationships/activities/interests listed below that are related to the content of your manuscript. "Related" means any relation with for-profit or not-for-profit third parties whose interests may be affected by the content of the manuscript. Disclosure represents a commitment to transparency and does not necessarily indicate a bias. If you are in doubt about whether to list a relationship/activity/interest, it is preferable that you do so.

The author's relationships/activities/interests should be defined broadly. For example, if your manuscript pertains to the epidemiology of hypertension, you should declare all relationships with manufacturers of antihypertensive medication, even if that medication is not mentioned in the manuscript.

In item #1 below, report all support for the work reported in this manuscript without time limit. For all other items, the time frame for disclosure is the past 36 months.

|                                                    | Name all entities with whom you have this relationship or indicate none (add rows as needed)                                                                                   | Specifications/Comments (e.g., if payments were made to you or to your institution)                                                                                                                                                                                                                                                             |         |             |          |             |           |             |
|----------------------------------------------------|--------------------------------------------------------------------------------------------------------------------------------------------------------------------------------|-------------------------------------------------------------------------------------------------------------------------------------------------------------------------------------------------------------------------------------------------------------------------------------------------------------------------------------------------|---------|-------------|----------|-------------|-----------|-------------|
| Time frame: Since the initial planning of the work |                                                                                                                                                                                |                                                                                                                                                                                                                                                                                                                                                 |         |             |          |             |           |             |
| <b>1</b>                                           | All support for the present manuscript (e.g., funding, provision of study materials, medical writing, article processing charges, etc.)<br><b>No time limit for this item.</b> | <input checked="" type="checkbox"/> <b>None</b><br><table border="1" style="width: 100%; height: 40px; margin-top: 5px;"> <tr><td> </td><td> </td></tr> <tr><td> </td><td> </td></tr> <tr><td> </td><td> </td></tr> </table> <div style="font-size: small; text-align: right; margin-top: 5px;">Click the tab key to add additional rows.</div> |         |             |          |             |           |             |
|                                                    |                                                                                                                                                                                |                                                                                                                                                                                                                                                                                                                                                 |         |             |          |             |           |             |
|                                                    |                                                                                                                                                                                |                                                                                                                                                                                                                                                                                                                                                 |         |             |          |             |           |             |
|                                                    |                                                                                                                                                                                |                                                                                                                                                                                                                                                                                                                                                 |         |             |          |             |           |             |
| Time frame: past 36 months                         |                                                                                                                                                                                |                                                                                                                                                                                                                                                                                                                                                 |         |             |          |             |           |             |
| <b>2</b>                                           | Grants or contracts from any entity (if not indicated in item #1 above).                                                                                                       | <input checked="" type="checkbox"/> <b>None</b><br><table border="1" style="width: 100%; margin-top: 5px;"> <tr><td>Alexion</td><td>institution</td></tr> <tr><td>Orphalan</td><td>institution</td></tr> <tr><td>Addmedica</td><td>Institution</td></tr> </table>                                                                               | Alexion | institution | Orphalan | institution | Addmedica | Institution |
| Alexion                                            | institution                                                                                                                                                                    |                                                                                                                                                                                                                                                                                                                                                 |         |             |          |             |           |             |
| Orphalan                                           | institution                                                                                                                                                                    |                                                                                                                                                                                                                                                                                                                                                 |         |             |          |             |           |             |
| Addmedica                                          | Institution                                                                                                                                                                    |                                                                                                                                                                                                                                                                                                                                                 |         |             |          |             |           |             |
| <b>3</b>                                           | Royalties or licenses                                                                                                                                                          | <input checked="" type="checkbox"/> <b>None</b><br><table border="1" style="width: 100%; height: 40px; margin-top: 5px;"> <tr><td> </td><td> </td></tr> <tr><td> </td><td> </td></tr> <tr><td> </td><td> </td></tr> </table>                                                                                                                    |         |             |          |             |           |             |
|                                                    |                                                                                                                                                                                |                                                                                                                                                                                                                                                                                                                                                 |         |             |          |             |           |             |
|                                                    |                                                                                                                                                                                |                                                                                                                                                                                                                                                                                                                                                 |         |             |          |             |           |             |
|                                                    |                                                                                                                                                                                |                                                                                                                                                                                                                                                                                                                                                 |         |             |          |             |           |             |

|    |                                                                                                              | Name all entities with whom you have this relationship or indicate none (add rows as needed) | Specifications/Comments (e.g., if payments were made to you or to your institution) |
|----|--------------------------------------------------------------------------------------------------------------|----------------------------------------------------------------------------------------------|-------------------------------------------------------------------------------------|
| 4  | Consulting fees                                                                                              | <input type="checkbox"/> None                                                                |                                                                                     |
|    |                                                                                                              | Univar                                                                                       | To me                                                                               |
|    |                                                                                                              | Orphalan                                                                                     | To me                                                                               |
|    |                                                                                                              | Alexion                                                                                      | To me                                                                               |
| 5  | Payment or honoraria for lectures, presentations, speakers bureaus, manuscript writing or educational events | <input type="checkbox"/> None                                                                |                                                                                     |
|    |                                                                                                              | Univar                                                                                       | To me                                                                               |
|    |                                                                                                              | Alexion                                                                                      | To me                                                                               |
|    |                                                                                                              | Orphalan                                                                                     | To me                                                                               |
| 6  | Payment for expert testimony                                                                                 | <input checked="" type="checkbox"/> None                                                     |                                                                                     |
|    |                                                                                                              |                                                                                              |                                                                                     |
|    |                                                                                                              |                                                                                              |                                                                                     |
| 7  | Support for attending meetings and/or travel                                                                 | <input type="checkbox"/> None                                                                |                                                                                     |
|    |                                                                                                              | Alexion                                                                                      |                                                                                     |
|    |                                                                                                              | Orphalan                                                                                     |                                                                                     |
|    |                                                                                                              | Univar                                                                                       |                                                                                     |
| 8  | Patents planned, issued or pending                                                                           | <input checked="" type="checkbox"/> None                                                     |                                                                                     |
|    |                                                                                                              |                                                                                              |                                                                                     |
|    |                                                                                                              |                                                                                              |                                                                                     |
| 9  | Participation on a Data Safety Monitoring Board or Advisory Board                                            | <input type="checkbox"/> None                                                                |                                                                                     |
|    |                                                                                                              | Alexion                                                                                      | To me                                                                               |
|    |                                                                                                              | Univar                                                                                       | To me                                                                               |
|    |                                                                                                              | Orphalan                                                                                     | To me                                                                               |
| 10 | Leadership or fiduciary role in other board, society, committee or advocacy group, paid or unpaid            | <input checked="" type="checkbox"/> None                                                     |                                                                                     |
|    |                                                                                                              |                                                                                              |                                                                                     |
|    |                                                                                                              |                                                                                              |                                                                                     |

|    |                                                                                  | Name all entities with whom you have this relationship or indicate none (add rows as needed)                                                                                                   | Specifications/Comments (e.g., if payments were made to you or to your institution) |  |  |  |  |  |  |
|----|----------------------------------------------------------------------------------|------------------------------------------------------------------------------------------------------------------------------------------------------------------------------------------------|-------------------------------------------------------------------------------------|--|--|--|--|--|--|
| 11 | Stock or stock options                                                           | <input checked="" type="checkbox"/> None<br><table border="1" data-bbox="376 412 1490 510"> <tr><td> </td><td> </td></tr> <tr><td> </td><td> </td></tr> <tr><td> </td><td> </td></tr> </table> |                                                                                     |  |  |  |  |  |  |
|    |                                                                                  |                                                                                                                                                                                                |                                                                                     |  |  |  |  |  |  |
|    |                                                                                  |                                                                                                                                                                                                |                                                                                     |  |  |  |  |  |  |
|    |                                                                                  |                                                                                                                                                                                                |                                                                                     |  |  |  |  |  |  |
| 12 | Receipt of equipment, materials, drugs, medical writing, gifts or other services | <input checked="" type="checkbox"/> None<br><table border="1" data-bbox="376 622 1490 721"> <tr><td> </td><td> </td></tr> <tr><td> </td><td> </td></tr> <tr><td> </td><td> </td></tr> </table> |                                                                                     |  |  |  |  |  |  |
|    |                                                                                  |                                                                                                                                                                                                |                                                                                     |  |  |  |  |  |  |
|    |                                                                                  |                                                                                                                                                                                                |                                                                                     |  |  |  |  |  |  |
|    |                                                                                  |                                                                                                                                                                                                |                                                                                     |  |  |  |  |  |  |
| 13 | Other financial or non-financial interests                                       | <input checked="" type="checkbox"/> None<br><table border="1" data-bbox="376 833 1490 931"> <tr><td> </td><td> </td></tr> <tr><td> </td><td> </td></tr> <tr><td> </td><td> </td></tr> </table> |                                                                                     |  |  |  |  |  |  |
|    |                                                                                  |                                                                                                                                                                                                |                                                                                     |  |  |  |  |  |  |
|    |                                                                                  |                                                                                                                                                                                                |                                                                                     |  |  |  |  |  |  |
|    |                                                                                  |                                                                                                                                                                                                |                                                                                     |  |  |  |  |  |  |

Please place an "X" next to the following statement to indicate your agreement:

I certify that I have answered every question and have not altered the wording of any of the questions on this form.

### ICMJE DISCLOSURE FORM

**Date:** 3/20/2024

**Your Name:** Karl Heinz Weiss

**Manuscript Title:** Non-ceruloplasmin copper and urinary copper in clinically stable Wilson Disease: Alignment with recommended targets and values in healthy persons

**Manuscript Number (if known):** JHEPR-D-23-01117

In the interest of transparency, we ask you to disclose all relationships/activities/interests listed below that are related to the content of your manuscript. "Related" means any relation with for-profit or not-for-profit third parties whose interests may be affected by the content of the manuscript. Disclosure represents a commitment to transparency and does not necessarily indicate a bias. If you are in doubt about whether to list a relationship/activity/interest, it is preferable that you do so.

The author's relationships/activities/interests should be defined broadly. For example, if your manuscript pertains to the epidemiology of hypertension, you should declare all relationships with manufacturers of antihypertensive medication, even if that medication is not mentioned in the manuscript.

In item #1 below, report all support for the work reported in this manuscript without time limit. For all other items, the time frame for disclosure is the past 36 months.

|                                                           |                                                                                                                                                                                | Name all entities with whom you have this relationship or indicate none (add rows as needed) | Specifications/Comments (e.g., if payments were made to you or to your institution) |
|-----------------------------------------------------------|--------------------------------------------------------------------------------------------------------------------------------------------------------------------------------|----------------------------------------------------------------------------------------------|-------------------------------------------------------------------------------------|
| <b>Time frame: Since the initial planning of the work</b> |                                                                                                                                                                                |                                                                                              |                                                                                     |
| <b>1</b>                                                  | All support for the present manuscript (e.g., funding, provision of study materials, medical writing, article processing charges, etc.)<br><b>No time limit for this item.</b> | <input checked="" type="checkbox"/> None                                                     |                                                                                     |
|                                                           |                                                                                                                                                                                | Orphalan                                                                                     | Study grant to institution                                                          |
|                                                           |                                                                                                                                                                                |                                                                                              | Click the tab key to add additional rows.                                           |
| <b>Time frame: past 36 months</b>                         |                                                                                                                                                                                |                                                                                              |                                                                                     |
| <b>2</b>                                                  | Grants or contracts from any entity (if not indicated in item #1 above).                                                                                                       | <input checked="" type="checkbox"/> None                                                     |                                                                                     |
|                                                           |                                                                                                                                                                                |                                                                                              |                                                                                     |
|                                                           |                                                                                                                                                                                |                                                                                              |                                                                                     |
| <b>3</b>                                                  | Royalties or licenses                                                                                                                                                          | <input checked="" type="checkbox"/> None                                                     |                                                                                     |
|                                                           |                                                                                                                                                                                |                                                                                              |                                                                                     |
|                                                           |                                                                                                                                                                                |                                                                                              |                                                                                     |

|                                                                                 |                                                                                                              | Name all entities with whom you have this relationship or indicate none (add rows as needed)                                                                                                                                                                                                                                                                                                 | Specifications/Comments (e.g., if payments were made to you or to your institution) |          |  |  |  |  |  |
|---------------------------------------------------------------------------------|--------------------------------------------------------------------------------------------------------------|----------------------------------------------------------------------------------------------------------------------------------------------------------------------------------------------------------------------------------------------------------------------------------------------------------------------------------------------------------------------------------------------|-------------------------------------------------------------------------------------|----------|--|--|--|--|--|
| 4                                                                               | Consulting fees                                                                                              | <input type="checkbox"/> None<br><table border="1" style="width: 100%; border-collapse: collapse;"> <tr><td style="width: 50%; height: 20px;"></td><td style="width: 50%;"></td></tr> <tr><td style="height: 20px;"></td><td></td></tr> <tr><td style="height: 20px;"></td><td></td></tr> </table>                                                                                           |                                                                                     |          |  |  |  |  |  |
|                                                                                 |                                                                                                              |                                                                                                                                                                                                                                                                                                                                                                                              |                                                                                     |          |  |  |  |  |  |
|                                                                                 |                                                                                                              |                                                                                                                                                                                                                                                                                                                                                                                              |                                                                                     |          |  |  |  |  |  |
|                                                                                 |                                                                                                              |                                                                                                                                                                                                                                                                                                                                                                                              |                                                                                     |          |  |  |  |  |  |
| 5                                                                               | Payment or honoraria for lectures, presentations, speakers bureaus, manuscript writing or educational events | <input checked="" type="checkbox"/> None<br><table border="1" style="width: 100%; border-collapse: collapse;"> <tr> <td style="width: 50%; height: 20px;">Orphalan, Alexion, Falk, Abbvie, Medscape</td> <td style="width: 50%;">personal</td> </tr> <tr><td style="height: 20px;"></td><td></td></tr> <tr><td style="height: 20px;"></td><td></td></tr> </table>                            | Orphalan, Alexion, Falk, Abbvie, Medscape                                           | personal |  |  |  |  |  |
| Orphalan, Alexion, Falk, Abbvie, Medscape                                       | personal                                                                                                     |                                                                                                                                                                                                                                                                                                                                                                                              |                                                                                     |          |  |  |  |  |  |
|                                                                                 |                                                                                                              |                                                                                                                                                                                                                                                                                                                                                                                              |                                                                                     |          |  |  |  |  |  |
|                                                                                 |                                                                                                              |                                                                                                                                                                                                                                                                                                                                                                                              |                                                                                     |          |  |  |  |  |  |
| 6                                                                               | Payment for expert testimony                                                                                 | <input checked="" type="checkbox"/> None<br><table border="1" style="width: 100%; border-collapse: collapse;"> <tr><td style="width: 50%; height: 20px;"></td><td style="width: 50%;"></td></tr> <tr><td style="height: 20px;"></td><td></td></tr> <tr><td style="height: 20px;"></td><td></td></tr> </table>                                                                                |                                                                                     |          |  |  |  |  |  |
|                                                                                 |                                                                                                              |                                                                                                                                                                                                                                                                                                                                                                                              |                                                                                     |          |  |  |  |  |  |
|                                                                                 |                                                                                                              |                                                                                                                                                                                                                                                                                                                                                                                              |                                                                                     |          |  |  |  |  |  |
|                                                                                 |                                                                                                              |                                                                                                                                                                                                                                                                                                                                                                                              |                                                                                     |          |  |  |  |  |  |
| 7                                                                               | Support for attending meetings and/or travel                                                                 | <input checked="" type="checkbox"/> None<br><table border="1" style="width: 100%; border-collapse: collapse;"> <tr><td style="width: 50%; height: 20px;"></td><td style="width: 50%;"></td></tr> <tr><td style="height: 20px;"></td><td></td></tr> <tr><td style="height: 20px;"></td><td></td></tr> </table>                                                                                |                                                                                     |          |  |  |  |  |  |
|                                                                                 |                                                                                                              |                                                                                                                                                                                                                                                                                                                                                                                              |                                                                                     |          |  |  |  |  |  |
|                                                                                 |                                                                                                              |                                                                                                                                                                                                                                                                                                                                                                                              |                                                                                     |          |  |  |  |  |  |
|                                                                                 |                                                                                                              |                                                                                                                                                                                                                                                                                                                                                                                              |                                                                                     |          |  |  |  |  |  |
| 8                                                                               | Patents planned, issued or pending                                                                           | <input checked="" type="checkbox"/> None<br><table border="1" style="width: 100%; border-collapse: collapse;"> <tr><td style="width: 50%; height: 20px;"></td><td style="width: 50%;"></td></tr> <tr><td style="height: 20px;"></td><td></td></tr> <tr><td style="height: 20px;"></td><td></td></tr> </table>                                                                                |                                                                                     |          |  |  |  |  |  |
|                                                                                 |                                                                                                              |                                                                                                                                                                                                                                                                                                                                                                                              |                                                                                     |          |  |  |  |  |  |
|                                                                                 |                                                                                                              |                                                                                                                                                                                                                                                                                                                                                                                              |                                                                                     |          |  |  |  |  |  |
|                                                                                 |                                                                                                              |                                                                                                                                                                                                                                                                                                                                                                                              |                                                                                     |          |  |  |  |  |  |
| 9                                                                               | Participation on a Data Safety Monitoring Board or Advisory Board                                            | <input type="checkbox"/> None<br><table border="1" style="width: 100%; border-collapse: collapse;"> <tr> <td style="width: 50%; height: 20px;">Orphalan, Alexion, Univar, Ultragenyx, Vivet therapeutics, Pfizer, Bayer, Roche</td> <td style="width: 50%;">personal</td> </tr> <tr><td style="height: 20px;"></td><td></td></tr> <tr><td style="height: 20px;"></td><td></td></tr> </table> | Orphalan, Alexion, Univar, Ultragenyx, Vivet therapeutics, Pfizer, Bayer, Roche     | personal |  |  |  |  |  |
| Orphalan, Alexion, Univar, Ultragenyx, Vivet therapeutics, Pfizer, Bayer, Roche | personal                                                                                                     |                                                                                                                                                                                                                                                                                                                                                                                              |                                                                                     |          |  |  |  |  |  |
|                                                                                 |                                                                                                              |                                                                                                                                                                                                                                                                                                                                                                                              |                                                                                     |          |  |  |  |  |  |
|                                                                                 |                                                                                                              |                                                                                                                                                                                                                                                                                                                                                                                              |                                                                                     |          |  |  |  |  |  |
| 10                                                                              | Leadership or fiduciary role in other board, society, committee or advocacy group, paid or unpaid            | <input checked="" type="checkbox"/> None<br><table border="1" style="width: 100%; border-collapse: collapse;"> <tr><td style="width: 50%; height: 20px;"></td><td style="width: 50%;"></td></tr> <tr><td style="height: 20px;"></td><td></td></tr> <tr><td style="height: 20px;"></td><td></td></tr> </table>                                                                                |                                                                                     |          |  |  |  |  |  |
|                                                                                 |                                                                                                              |                                                                                                                                                                                                                                                                                                                                                                                              |                                                                                     |          |  |  |  |  |  |
|                                                                                 |                                                                                                              |                                                                                                                                                                                                                                                                                                                                                                                              |                                                                                     |          |  |  |  |  |  |
|                                                                                 |                                                                                                              |                                                                                                                                                                                                                                                                                                                                                                                              |                                                                                     |          |  |  |  |  |  |

|                                                                                                                                                                                                                                                               |                                                                                  | Name all entities with whom you have this relationship or indicate none (add rows as needed) | Specifications/Comments (e.g., if payments were made to you or to your institution) |
|---------------------------------------------------------------------------------------------------------------------------------------------------------------------------------------------------------------------------------------------------------------|----------------------------------------------------------------------------------|----------------------------------------------------------------------------------------------|-------------------------------------------------------------------------------------|
| 11                                                                                                                                                                                                                                                            | Stock or stock options                                                           | <input checked="" type="checkbox"/> None                                                     |                                                                                     |
|                                                                                                                                                                                                                                                               |                                                                                  |                                                                                              |                                                                                     |
|                                                                                                                                                                                                                                                               |                                                                                  |                                                                                              |                                                                                     |
|                                                                                                                                                                                                                                                               |                                                                                  |                                                                                              |                                                                                     |
| 12                                                                                                                                                                                                                                                            | Receipt of equipment, materials, drugs, medical writing, gifts or other services | <input checked="" type="checkbox"/> None                                                     |                                                                                     |
|                                                                                                                                                                                                                                                               |                                                                                  |                                                                                              |                                                                                     |
|                                                                                                                                                                                                                                                               |                                                                                  |                                                                                              |                                                                                     |
|                                                                                                                                                                                                                                                               |                                                                                  |                                                                                              |                                                                                     |
| 13                                                                                                                                                                                                                                                            | Other financial or non-financial interests                                       | <input checked="" type="checkbox"/> None                                                     |                                                                                     |
|                                                                                                                                                                                                                                                               |                                                                                  |                                                                                              |                                                                                     |
|                                                                                                                                                                                                                                                               |                                                                                  |                                                                                              |                                                                                     |
|                                                                                                                                                                                                                                                               |                                                                                  |                                                                                              |                                                                                     |
| <p><b>Please place an "X" next to the following statement to indicate your agreement:</b></p> <p><input checked="" type="checkbox"/> I certify that I have answered every question and have not altered the wording of any of the questions on this form.</p> |                                                                                  |                                                                                              |                                                                                     |

### ICMJE DISCLOSURE FORM

**Date:** 3/19/2024

**Your Name:** CARLOS ALEXANDRE TWARDOWSCHY

**Manuscript Title:** Non-ceruloplasmin copper and urinary copper in clinically stable Wilson Disease: Alignment with recommended targets and values in healthy persons

**Manuscript Number (if known):** JHEPR-D-23-01117

In the interest of transparency, we ask you to disclose all relationships/activities/interests listed below that are related to the content of your manuscript. "Related" means any relation with for-profit or not-for-profit third parties whose interests may be affected by the content of the manuscript. Disclosure represents a commitment to transparency and does not necessarily indicate a bias. If you are in doubt about whether to list a relationship/activity/interest, it is preferable that you do so.

The author's relationships/activities/interests should be defined broadly. For example, if your manuscript pertains to the epidemiology of hypertension, you should declare all relationships with manufacturers of antihypertensive medication, even if that medication is not mentioned in the manuscript.

In item #1 below, report all support for the work reported in this manuscript without time limit. For all other items, the time frame for disclosure is the past 36 months.

|                                                           | Name all entities with whom you have this relationship or indicate none (add rows as needed)                                                                            | Specifications/Comments (e.g., if payments were made to you or to your institution)                                                                                                                                                                                                                                                                                          |                |  |                          |  |                                           |  |
|-----------------------------------------------------------|-------------------------------------------------------------------------------------------------------------------------------------------------------------------------|------------------------------------------------------------------------------------------------------------------------------------------------------------------------------------------------------------------------------------------------------------------------------------------------------------------------------------------------------------------------------|----------------|--|--------------------------|--|-------------------------------------------|--|
| <b>Time frame: Since the initial planning of the work</b> |                                                                                                                                                                         |                                                                                                                                                                                                                                                                                                                                                                              |                |  |                          |  |                                           |  |
| 1                                                         | All support for the present manuscript (e.g., funding, provision of study materials, medical writing, article processing charges, etc.)<br>No time limit for this item. | <input type="checkbox"/> None<br><table border="1" style="width: 100%; border-collapse: collapse; margin-top: 5px;"> <tr> <td style="width: 60%;">Paper revision</td> <td></td> </tr> <tr> <td>Study patient enrollment</td> <td></td> </tr> <tr> <td colspan="2" style="text-align: right; font-size: small;">Click the tab key to add additional rows.</td> </tr> </table> | Paper revision |  | Study patient enrollment |  | Click the tab key to add additional rows. |  |
| Paper revision                                            |                                                                                                                                                                         |                                                                                                                                                                                                                                                                                                                                                                              |                |  |                          |  |                                           |  |
| Study patient enrollment                                  |                                                                                                                                                                         |                                                                                                                                                                                                                                                                                                                                                                              |                |  |                          |  |                                           |  |
| Click the tab key to add additional rows.                 |                                                                                                                                                                         |                                                                                                                                                                                                                                                                                                                                                                              |                |  |                          |  |                                           |  |
| <b>Time frame: past 36 months</b>                         |                                                                                                                                                                         |                                                                                                                                                                                                                                                                                                                                                                              |                |  |                          |  |                                           |  |
| 2                                                         | Grants or contracts from any entity (if not indicated in item #1 above).                                                                                                | <input checked="" type="checkbox"/> None<br><table border="1" style="width: 100%; border-collapse: collapse; margin-top: 5px;"> <tr><td style="width: 60%; height: 15px;"></td><td></td></tr> <tr><td style="height: 15px;"></td><td></td></tr> <tr><td style="height: 15px;"></td><td></td></tr> </table>                                                                   |                |  |                          |  |                                           |  |
|                                                           |                                                                                                                                                                         |                                                                                                                                                                                                                                                                                                                                                                              |                |  |                          |  |                                           |  |
|                                                           |                                                                                                                                                                         |                                                                                                                                                                                                                                                                                                                                                                              |                |  |                          |  |                                           |  |
|                                                           |                                                                                                                                                                         |                                                                                                                                                                                                                                                                                                                                                                              |                |  |                          |  |                                           |  |
| 3                                                         | Royalties or licenses                                                                                                                                                   | <input checked="" type="checkbox"/> None<br><table border="1" style="width: 100%; border-collapse: collapse; margin-top: 5px;"> <tr><td style="width: 60%; height: 15px;"></td><td></td></tr> <tr><td style="height: 15px;"></td><td></td></tr> <tr><td style="height: 15px;"></td><td></td></tr> </table>                                                                   |                |  |                          |  |                                           |  |
|                                                           |                                                                                                                                                                         |                                                                                                                                                                                                                                                                                                                                                                              |                |  |                          |  |                                           |  |
|                                                           |                                                                                                                                                                         |                                                                                                                                                                                                                                                                                                                                                                              |                |  |                          |  |                                           |  |
|                                                           |                                                                                                                                                                         |                                                                                                                                                                                                                                                                                                                                                                              |                |  |                          |  |                                           |  |



|    |                                                                                                              | Name all entities with whom you have this relationship or indicate none (add rows as needed) | Specifications/Comments (e.g., if payments were made to you or to your institution) |
|----|--------------------------------------------------------------------------------------------------------------|----------------------------------------------------------------------------------------------|-------------------------------------------------------------------------------------|
| 4  | Consulting fees                                                                                              | <input checked="" type="checkbox"/> None                                                     |                                                                                     |
|    |                                                                                                              |                                                                                              |                                                                                     |
|    |                                                                                                              |                                                                                              |                                                                                     |
|    |                                                                                                              |                                                                                              |                                                                                     |
| 5  | Payment or honoraria for lectures, presentations, speakers bureaus, manuscript writing or educational events | <input checked="" type="checkbox"/> None                                                     |                                                                                     |
|    |                                                                                                              |                                                                                              |                                                                                     |
|    |                                                                                                              |                                                                                              |                                                                                     |
|    |                                                                                                              |                                                                                              |                                                                                     |
| 6  | Payment for expert testimony                                                                                 | <input checked="" type="checkbox"/> None                                                     |                                                                                     |
|    |                                                                                                              |                                                                                              |                                                                                     |
|    |                                                                                                              |                                                                                              |                                                                                     |
|    |                                                                                                              |                                                                                              |                                                                                     |
| 7  | Support for attending meetings and/or travel                                                                 | <input checked="" type="checkbox"/> None                                                     |                                                                                     |
|    |                                                                                                              |                                                                                              |                                                                                     |
|    |                                                                                                              |                                                                                              |                                                                                     |
|    |                                                                                                              |                                                                                              |                                                                                     |
| 8  | Patents planned, issued or pending                                                                           | <input checked="" type="checkbox"/> None                                                     |                                                                                     |
|    |                                                                                                              |                                                                                              |                                                                                     |
|    |                                                                                                              |                                                                                              |                                                                                     |
|    |                                                                                                              |                                                                                              |                                                                                     |
| 9  | Participation on a Data Safety Monitoring Board or Advisory Board                                            | <input checked="" type="checkbox"/> None                                                     |                                                                                     |
|    |                                                                                                              |                                                                                              |                                                                                     |
|    |                                                                                                              |                                                                                              |                                                                                     |
|    |                                                                                                              |                                                                                              |                                                                                     |
| 10 | Leadership or fiduciary role in other board, society, committee or advocacy group, paid or unpaid            | <input checked="" type="checkbox"/> None                                                     |                                                                                     |
|    |                                                                                                              |                                                                                              |                                                                                     |
|    |                                                                                                              |                                                                                              |                                                                                     |
|    |                                                                                                              |                                                                                              |                                                                                     |

---

|    |                                                                                  | Name all entities with whom you have this relationship or indicate none (add rows as needed) | Specifications/Comments (e.g., if payments were made to you or to your institution) |
|----|----------------------------------------------------------------------------------|----------------------------------------------------------------------------------------------|-------------------------------------------------------------------------------------|
| 11 | Stock or stock options                                                           | <input checked="" type="checkbox"/> None                                                     |                                                                                     |
|    |                                                                                  |                                                                                              |                                                                                     |
| 12 | Receipt of equipment, materials, drugs, medical writing, gifts or other services | <input checked="" type="checkbox"/> None                                                     |                                                                                     |
|    |                                                                                  |                                                                                              |                                                                                     |
| 13 | Other financial or non-financial interests                                       | <input checked="" type="checkbox"/> None                                                     |                                                                                     |
|    |                                                                                  |                                                                                              |                                                                                     |

Please place an "X" next to the following statement to indicate your agreement:

I certify that I have answered every question and have not altered the wording of any of the questions on this form.

### ICMJE DISCLOSURE FORM

**Date:** 3/19/2024

**Your Name:** C.Omar F Kamlin

**Manuscript Title:** Non-ceruloplasmin copper and urinary copper in clinically stable Wilson Disease: Alignment with recommended targets and values in healthy persons

**Manuscript Number (if known):** JHEPR-D-23-01117

In the interest of transparency, we ask you to disclose all relationships/activities/interests listed below that are related to the content of your manuscript. "Related" means any relation with for-profit or not-for-profit third parties whose interests may be affected by the content of the manuscript. Disclosure represents a commitment to transparency and does not necessarily indicate a bias. If you are in doubt about whether to list a relationship/activity/interest, it is preferable that you do so.

The author's relationships/activities/interests should be defined broadly. For example, if your manuscript pertains to the epidemiology of hypertension, you should declare all relationships with manufacturers of antihypertensive medication, even if that medication is not mentioned in the manuscript.

In item #1 below, report all support for the work reported in this manuscript without time limit. For all other items, the time frame for disclosure is the past 36 months.

|                                                    | Name all entities with whom you have this relationship or indicate none (add rows as needed)                                                                                   | Specifications/Comments (e.g., if payments were made to you or to your institution)                                                                                                                                                                                                                                                                           |  |  |  |  |  |  |
|----------------------------------------------------|--------------------------------------------------------------------------------------------------------------------------------------------------------------------------------|---------------------------------------------------------------------------------------------------------------------------------------------------------------------------------------------------------------------------------------------------------------------------------------------------------------------------------------------------------------|--|--|--|--|--|--|
| Time frame: Since the initial planning of the work |                                                                                                                                                                                |                                                                                                                                                                                                                                                                                                                                                               |  |  |  |  |  |  |
| <b>1</b>                                           | All support for the present manuscript (e.g., funding, provision of study materials, medical writing, article processing charges, etc.)<br><b>No time limit for this item.</b> | <input checked="" type="checkbox"/> <b>None</b><br><table border="1" style="width: 100%; height: 40px; margin-top: 5px;"> <tr><td style="width: 60%;"></td><td></td></tr> <tr><td></td><td></td></tr> <tr><td></td><td></td></tr> </table> <div style="text-align: right; font-size: small; margin-top: 5px;">Click the tab key to add additional rows.</div> |  |  |  |  |  |  |
|                                                    |                                                                                                                                                                                |                                                                                                                                                                                                                                                                                                                                                               |  |  |  |  |  |  |
|                                                    |                                                                                                                                                                                |                                                                                                                                                                                                                                                                                                                                                               |  |  |  |  |  |  |
|                                                    |                                                                                                                                                                                |                                                                                                                                                                                                                                                                                                                                                               |  |  |  |  |  |  |
| Time frame: past 36 months                         |                                                                                                                                                                                |                                                                                                                                                                                                                                                                                                                                                               |  |  |  |  |  |  |
| <b>2</b>                                           | Grants or contracts from any entity (if not indicated in item #1 above).                                                                                                       | <input checked="" type="checkbox"/> <b>None</b><br><table border="1" style="width: 100%; height: 40px; margin-top: 5px;"> <tr><td style="width: 60%;"></td><td></td></tr> <tr><td></td><td></td></tr> <tr><td></td><td></td></tr> </table>                                                                                                                    |  |  |  |  |  |  |
|                                                    |                                                                                                                                                                                |                                                                                                                                                                                                                                                                                                                                                               |  |  |  |  |  |  |
|                                                    |                                                                                                                                                                                |                                                                                                                                                                                                                                                                                                                                                               |  |  |  |  |  |  |
|                                                    |                                                                                                                                                                                |                                                                                                                                                                                                                                                                                                                                                               |  |  |  |  |  |  |
| <b>3</b>                                           | Royalties or licenses                                                                                                                                                          | <input checked="" type="checkbox"/> <b>None</b><br><table border="1" style="width: 100%; height: 40px; margin-top: 5px;"> <tr><td style="width: 60%;"></td><td></td></tr> <tr><td></td><td></td></tr> <tr><td></td><td></td></tr> </table>                                                                                                                    |  |  |  |  |  |  |
|                                                    |                                                                                                                                                                                |                                                                                                                                                                                                                                                                                                                                                               |  |  |  |  |  |  |
|                                                    |                                                                                                                                                                                |                                                                                                                                                                                                                                                                                                                                                               |  |  |  |  |  |  |
|                                                    |                                                                                                                                                                                |                                                                                                                                                                                                                                                                                                                                                               |  |  |  |  |  |  |

|    |                                                                                                              | Name all entities with whom you have this relationship or indicate none (add rows as needed)                                                                                                                                                                                                                         | Specifications/Comments (e.g., if payments were made to you or to your institution) |  |  |  |  |  |  |
|----|--------------------------------------------------------------------------------------------------------------|----------------------------------------------------------------------------------------------------------------------------------------------------------------------------------------------------------------------------------------------------------------------------------------------------------------------|-------------------------------------------------------------------------------------|--|--|--|--|--|--|
| 4  | Consulting fees                                                                                              | <input checked="" type="checkbox"/> <b>None</b><br><table border="1" style="width: 100%; border-collapse: collapse;"> <tr><td style="width: 50%; height: 20px;"></td><td style="width: 50%;"></td></tr> <tr><td style="height: 20px;"></td><td></td></tr> <tr><td style="height: 20px;"></td><td></td></tr> </table> |                                                                                     |  |  |  |  |  |  |
|    |                                                                                                              |                                                                                                                                                                                                                                                                                                                      |                                                                                     |  |  |  |  |  |  |
|    |                                                                                                              |                                                                                                                                                                                                                                                                                                                      |                                                                                     |  |  |  |  |  |  |
|    |                                                                                                              |                                                                                                                                                                                                                                                                                                                      |                                                                                     |  |  |  |  |  |  |
| 5  | Payment or honoraria for lectures, presentations, speakers bureaus, manuscript writing or educational events | <input checked="" type="checkbox"/> <b>None</b><br><table border="1" style="width: 100%; border-collapse: collapse;"> <tr><td style="width: 50%; height: 20px;"></td><td style="width: 50%;"></td></tr> <tr><td style="height: 20px;"></td><td></td></tr> <tr><td style="height: 20px;"></td><td></td></tr> </table> |                                                                                     |  |  |  |  |  |  |
|    |                                                                                                              |                                                                                                                                                                                                                                                                                                                      |                                                                                     |  |  |  |  |  |  |
|    |                                                                                                              |                                                                                                                                                                                                                                                                                                                      |                                                                                     |  |  |  |  |  |  |
|    |                                                                                                              |                                                                                                                                                                                                                                                                                                                      |                                                                                     |  |  |  |  |  |  |
| 6  | Payment for expert testimony                                                                                 | <input checked="" type="checkbox"/> <b>None</b><br><table border="1" style="width: 100%; border-collapse: collapse;"> <tr><td style="width: 50%; height: 20px;"></td><td style="width: 50%;"></td></tr> <tr><td style="height: 20px;"></td><td></td></tr> <tr><td style="height: 20px;"></td><td></td></tr> </table> |                                                                                     |  |  |  |  |  |  |
|    |                                                                                                              |                                                                                                                                                                                                                                                                                                                      |                                                                                     |  |  |  |  |  |  |
|    |                                                                                                              |                                                                                                                                                                                                                                                                                                                      |                                                                                     |  |  |  |  |  |  |
|    |                                                                                                              |                                                                                                                                                                                                                                                                                                                      |                                                                                     |  |  |  |  |  |  |
| 7  | Support for attending meetings and/or travel                                                                 | <input checked="" type="checkbox"/> <b>None</b><br><table border="1" style="width: 100%; border-collapse: collapse;"> <tr><td style="width: 50%; height: 20px;"></td><td style="width: 50%;"></td></tr> <tr><td style="height: 20px;"></td><td></td></tr> <tr><td style="height: 20px;"></td><td></td></tr> </table> |                                                                                     |  |  |  |  |  |  |
|    |                                                                                                              |                                                                                                                                                                                                                                                                                                                      |                                                                                     |  |  |  |  |  |  |
|    |                                                                                                              |                                                                                                                                                                                                                                                                                                                      |                                                                                     |  |  |  |  |  |  |
|    |                                                                                                              |                                                                                                                                                                                                                                                                                                                      |                                                                                     |  |  |  |  |  |  |
| 8  | Patents planned, issued or pending                                                                           | <input checked="" type="checkbox"/> <b>None</b><br><table border="1" style="width: 100%; border-collapse: collapse;"> <tr><td style="width: 50%; height: 20px;"></td><td style="width: 50%;"></td></tr> <tr><td style="height: 20px;"></td><td></td></tr> <tr><td style="height: 20px;"></td><td></td></tr> </table> |                                                                                     |  |  |  |  |  |  |
|    |                                                                                                              |                                                                                                                                                                                                                                                                                                                      |                                                                                     |  |  |  |  |  |  |
|    |                                                                                                              |                                                                                                                                                                                                                                                                                                                      |                                                                                     |  |  |  |  |  |  |
|    |                                                                                                              |                                                                                                                                                                                                                                                                                                                      |                                                                                     |  |  |  |  |  |  |
| 9  | Participation on a Data Safety Monitoring Board or Advisory Board                                            | <input checked="" type="checkbox"/> <b>None</b><br><table border="1" style="width: 100%; border-collapse: collapse;"> <tr><td style="width: 50%; height: 20px;"></td><td style="width: 50%;"></td></tr> <tr><td style="height: 20px;"></td><td></td></tr> <tr><td style="height: 20px;"></td><td></td></tr> </table> |                                                                                     |  |  |  |  |  |  |
|    |                                                                                                              |                                                                                                                                                                                                                                                                                                                      |                                                                                     |  |  |  |  |  |  |
|    |                                                                                                              |                                                                                                                                                                                                                                                                                                                      |                                                                                     |  |  |  |  |  |  |
|    |                                                                                                              |                                                                                                                                                                                                                                                                                                                      |                                                                                     |  |  |  |  |  |  |
| 10 | Leadership or fiduciary role in other board, society, committee or advocacy group, paid or unpaid            | <input checked="" type="checkbox"/> <b>None</b><br><table border="1" style="width: 100%; border-collapse: collapse;"> <tr><td style="width: 50%; height: 20px;"></td><td style="width: 50%;"></td></tr> <tr><td style="height: 20px;"></td><td></td></tr> <tr><td style="height: 20px;"></td><td></td></tr> </table> |                                                                                     |  |  |  |  |  |  |
|    |                                                                                                              |                                                                                                                                                                                                                                                                                                                      |                                                                                     |  |  |  |  |  |  |
|    |                                                                                                              |                                                                                                                                                                                                                                                                                                                      |                                                                                     |  |  |  |  |  |  |
|    |                                                                                                              |                                                                                                                                                                                                                                                                                                                      |                                                                                     |  |  |  |  |  |  |

|    |                                                                                  | Name all entities with whom you have this relationship or indicate none (add rows as needed) | Specifications/Comments (e.g., if payments were made to you or to your institution) |
|----|----------------------------------------------------------------------------------|----------------------------------------------------------------------------------------------|-------------------------------------------------------------------------------------|
| 11 | Stock or stock options                                                           | <input checked="" type="checkbox"/> None                                                     |                                                                                     |
|    |                                                                                  |                                                                                              |                                                                                     |
|    |                                                                                  |                                                                                              |                                                                                     |
|    |                                                                                  |                                                                                              |                                                                                     |
| 12 | Receipt of equipment, materials, drugs, medical writing, gifts or other services | <input checked="" type="checkbox"/> None                                                     |                                                                                     |
|    |                                                                                  |                                                                                              |                                                                                     |
|    |                                                                                  |                                                                                              |                                                                                     |
|    |                                                                                  |                                                                                              |                                                                                     |
| 13 | Other financial or non-financial interests                                       | <input type="checkbox"/> None                                                                |                                                                                     |
|    |                                                                                  | Employee of Orphan SA                                                                        |                                                                                     |
|    |                                                                                  |                                                                                              |                                                                                     |
|    |                                                                                  |                                                                                              |                                                                                     |

Please place an "X" next to the following statement to indicate your agreement:

I certify that I have answered every question and have not altered the wording of any of the questions on this form.

### ICMJE DISCLOSURE FORM

**Date:** 3/11/2024

**Your Name:** Michael L Schilsky MD

**Manuscript Title:** Non-ceruloplasmin copper and urinary copper in clinically stable Wilson Disease: Alignment with recommended targets and values in healthy persons

**Manuscript Number (if known):** JHEPR-D-23-01117

In the interest of transparency, we ask you to disclose all relationships/activities/interests listed below that are related to the content of your manuscript. "Related" means any relation with for-profit or not-for-profit third parties whose interests may be affected by the content of the manuscript. Disclosure represents a commitment to transparency and does not necessarily indicate a bias. If you are in doubt about whether to list a relationship/activity/interest, it is preferable that you do so.

The author's relationships/activities/interests should be defined broadly. For example, if your manuscript pertains to the epidemiology of hypertension, you should declare all relationships with manufacturers of antihypertensive medication, even if that medication is not mentioned in the manuscript.

In item #1 below, report all support for the work reported in this manuscript without time limit. For all other items, the time frame for disclosure is the past 36 months.

|                                                    | Name all entities with whom you have this relationship or indicate none (add rows as needed)                                                                                   | Specifications/Comments (e.g., if payments were made to you or to your institution)                                                                                                                                                                                                                                                                                                               |                            |          |                    |         |                                           |  |
|----------------------------------------------------|--------------------------------------------------------------------------------------------------------------------------------------------------------------------------------|---------------------------------------------------------------------------------------------------------------------------------------------------------------------------------------------------------------------------------------------------------------------------------------------------------------------------------------------------------------------------------------------------|----------------------------|----------|--------------------|---------|-------------------------------------------|--|
| Time frame: Since the initial planning of the work |                                                                                                                                                                                |                                                                                                                                                                                                                                                                                                                                                                                                   |                            |          |                    |         |                                           |  |
| <b>1</b>                                           | All support for the present manuscript (e.g., funding, provision of study materials, medical writing, article processing charges, etc.)<br><b>No time limit for this item.</b> | <input checked="" type="checkbox"/> <b>None</b><br><table border="1" style="width: 100%; border-collapse: collapse; margin-top: 5px;"> <tr><td style="height: 20px;"> </td><td style="width: 50px;"> </td></tr> <tr><td style="height: 20px;"> </td><td> </td></tr> <tr><td colspan="2" style="text-align: right; font-size: small;">Click the tab key to add additional rows.</td></tr> </table> |                            |          |                    |         | Click the tab key to add additional rows. |  |
|                                                    |                                                                                                                                                                                |                                                                                                                                                                                                                                                                                                                                                                                                   |                            |          |                    |         |                                           |  |
|                                                    |                                                                                                                                                                                |                                                                                                                                                                                                                                                                                                                                                                                                   |                            |          |                    |         |                                           |  |
| Click the tab key to add additional rows.          |                                                                                                                                                                                |                                                                                                                                                                                                                                                                                                                                                                                                   |                            |          |                    |         |                                           |  |
| Time frame: past 36 months                         |                                                                                                                                                                                |                                                                                                                                                                                                                                                                                                                                                                                                   |                            |          |                    |         |                                           |  |
| <b>2</b>                                           | Grants or contracts from any entity (if not indicated in item #1 above).                                                                                                       | <input type="checkbox"/> <b>None</b><br><table border="1" style="width: 100%; border-collapse: collapse; margin-top: 5px;"> <tr><td style="width: 60%;">Wilson Disease Association</td><td>Orphalan</td></tr> <tr><td>Vivet Therapeutics</td><td>Alexion</td></tr> <tr><td style="height: 20px;"> </td><td> </td></tr> </table>                                                                   | Wilson Disease Association | Orphalan | Vivet Therapeutics | Alexion |                                           |  |
| Wilson Disease Association                         | Orphalan                                                                                                                                                                       |                                                                                                                                                                                                                                                                                                                                                                                                   |                            |          |                    |         |                                           |  |
| Vivet Therapeutics                                 | Alexion                                                                                                                                                                        |                                                                                                                                                                                                                                                                                                                                                                                                   |                            |          |                    |         |                                           |  |
|                                                    |                                                                                                                                                                                |                                                                                                                                                                                                                                                                                                                                                                                                   |                            |          |                    |         |                                           |  |
| <b>3</b>                                           | Royalties or licenses                                                                                                                                                          | <input type="checkbox"/> <b>None</b><br><table border="1" style="width: 100%; border-collapse: collapse; margin-top: 5px;"> <tr><td style="width: 60%;">Up To Date</td><td>Medscape</td></tr> <tr><td style="height: 20px;"> </td><td> </td></tr> <tr><td style="height: 20px;"> </td><td> </td></tr> </table>                                                                                    | Up To Date                 | Medscape |                    |         |                                           |  |
| Up To Date                                         | Medscape                                                                                                                                                                       |                                                                                                                                                                                                                                                                                                                                                                                                   |                            |          |                    |         |                                           |  |
|                                                    |                                                                                                                                                                                |                                                                                                                                                                                                                                                                                                                                                                                                   |                            |          |                    |         |                                           |  |
|                                                    |                                                                                                                                                                                |                                                                                                                                                                                                                                                                                                                                                                                                   |                            |          |                    |         |                                           |  |

|                                                               |                                                                                                              | Name all entities with whom you have this relationship or indicate none (add rows as needed)                                                                                                                                  | Specifications/Comments (e.g., if payments were made to you or to your institution) |         |  |  |  |  |  |
|---------------------------------------------------------------|--------------------------------------------------------------------------------------------------------------|-------------------------------------------------------------------------------------------------------------------------------------------------------------------------------------------------------------------------------|-------------------------------------------------------------------------------------|---------|--|--|--|--|--|
| 4                                                             | Consulting fees                                                                                              | <input type="checkbox"/> <b>None</b><br><table border="1"> <tr> <td>Arbomed</td> <td>DepYmed</td> </tr> <tr> <td></td> <td></td> </tr> <tr> <td></td> <td></td> </tr> </table>                                                | Arbomed                                                                             | DepYmed |  |  |  |  |  |
| Arbomed                                                       | DepYmed                                                                                                      |                                                                                                                                                                                                                               |                                                                                     |         |  |  |  |  |  |
|                                                               |                                                                                                              |                                                                                                                                                                                                                               |                                                                                     |         |  |  |  |  |  |
|                                                               |                                                                                                              |                                                                                                                                                                                                                               |                                                                                     |         |  |  |  |  |  |
| 5                                                             | Payment or honoraria for lectures, presentations, speakers bureaus, manuscript writing or educational events | <input checked="" type="checkbox"/> <b>None</b><br><table border="1"> <tr> <td></td> <td></td> </tr> <tr> <td></td> <td></td> </tr> </table>                                                                                  |                                                                                     |         |  |  |  |  |  |
|                                                               |                                                                                                              |                                                                                                                                                                                                                               |                                                                                     |         |  |  |  |  |  |
|                                                               |                                                                                                              |                                                                                                                                                                                                                               |                                                                                     |         |  |  |  |  |  |
| 6                                                             | Payment for expert testimony                                                                                 | <input checked="" type="checkbox"/> <b>None</b><br><table border="1"> <tr> <td></td> <td></td> </tr> <tr> <td></td> <td></td> </tr> </table>                                                                                  |                                                                                     |         |  |  |  |  |  |
|                                                               |                                                                                                              |                                                                                                                                                                                                                               |                                                                                     |         |  |  |  |  |  |
|                                                               |                                                                                                              |                                                                                                                                                                                                                               |                                                                                     |         |  |  |  |  |  |
| 7                                                             | Support for attending meetings and/or travel                                                                 | <input checked="" type="checkbox"/> <b>None</b><br><table border="1"> <tr> <td></td> <td></td> </tr> <tr> <td></td> <td></td> </tr> </table>                                                                                  |                                                                                     |         |  |  |  |  |  |
|                                                               |                                                                                                              |                                                                                                                                                                                                                               |                                                                                     |         |  |  |  |  |  |
|                                                               |                                                                                                              |                                                                                                                                                                                                                               |                                                                                     |         |  |  |  |  |  |
| 8                                                             | Patents planned, issued or pending                                                                           | <input checked="" type="checkbox"/> <b>None</b><br><table border="1"> <tr> <td></td> <td></td> </tr> <tr> <td></td> <td></td> </tr> </table>                                                                                  |                                                                                     |         |  |  |  |  |  |
|                                                               |                                                                                                              |                                                                                                                                                                                                                               |                                                                                     |         |  |  |  |  |  |
|                                                               |                                                                                                              |                                                                                                                                                                                                                               |                                                                                     |         |  |  |  |  |  |
| 9                                                             | Participation on a Data Safety Monitoring Board or Advisory Board                                            | <input type="checkbox"/> <b>None</b><br><table border="1"> <tr> <td>Arbomed</td> <td>DepYmed</td> </tr> <tr> <td></td> <td></td> </tr> <tr> <td></td> <td></td> </tr> </table>                                                | Arbomed                                                                             | DepYmed |  |  |  |  |  |
| Arbomed                                                       | DepYmed                                                                                                      |                                                                                                                                                                                                                               |                                                                                     |         |  |  |  |  |  |
|                                                               |                                                                                                              |                                                                                                                                                                                                                               |                                                                                     |         |  |  |  |  |  |
|                                                               |                                                                                                              |                                                                                                                                                                                                                               |                                                                                     |         |  |  |  |  |  |
| 10                                                            | Leadership or fiduciary role in other board, society, committee or advocacy group, paid or unpaid            | <input type="checkbox"/> <b>None</b><br><table border="1"> <tr> <td>Chair, Medical Advisory Committee, Wilson Disease Association</td> <td></td> </tr> <tr> <td></td> <td></td> </tr> <tr> <td></td> <td></td> </tr> </table> | Chair, Medical Advisory Committee, Wilson Disease Association                       |         |  |  |  |  |  |
| Chair, Medical Advisory Committee, Wilson Disease Association |                                                                                                              |                                                                                                                                                                                                                               |                                                                                     |         |  |  |  |  |  |
|                                                               |                                                                                                              |                                                                                                                                                                                                                               |                                                                                     |         |  |  |  |  |  |
|                                                               |                                                                                                              |                                                                                                                                                                                                                               |                                                                                     |         |  |  |  |  |  |

|           |                                                                                  | Name all entities with whom you have this relationship or indicate none (add rows as needed)                                                                                                          | Specifications/Comments (e.g., if payments were made to you or to your institution) |  |  |  |  |  |  |
|-----------|----------------------------------------------------------------------------------|-------------------------------------------------------------------------------------------------------------------------------------------------------------------------------------------------------|-------------------------------------------------------------------------------------|--|--|--|--|--|--|
| <b>11</b> | Stock or stock options                                                           | <input checked="" type="checkbox"/> <b>None</b><br><table border="1" data-bbox="376 412 1490 510"> <tr><td> </td><td> </td></tr> <tr><td> </td><td> </td></tr> <tr><td> </td><td> </td></tr> </table> |                                                                                     |  |  |  |  |  |  |
|           |                                                                                  |                                                                                                                                                                                                       |                                                                                     |  |  |  |  |  |  |
|           |                                                                                  |                                                                                                                                                                                                       |                                                                                     |  |  |  |  |  |  |
|           |                                                                                  |                                                                                                                                                                                                       |                                                                                     |  |  |  |  |  |  |
| <b>12</b> | Receipt of equipment, materials, drugs, medical writing, gifts or other services | <input checked="" type="checkbox"/> <b>None</b><br><table border="1" data-bbox="376 622 1490 721"> <tr><td> </td><td> </td></tr> <tr><td> </td><td> </td></tr> <tr><td> </td><td> </td></tr> </table> |                                                                                     |  |  |  |  |  |  |
|           |                                                                                  |                                                                                                                                                                                                       |                                                                                     |  |  |  |  |  |  |
|           |                                                                                  |                                                                                                                                                                                                       |                                                                                     |  |  |  |  |  |  |
|           |                                                                                  |                                                                                                                                                                                                       |                                                                                     |  |  |  |  |  |  |
| <b>13</b> | Other financial or non-financial interests                                       | <input checked="" type="checkbox"/> <b>None</b><br><table border="1" data-bbox="376 833 1490 931"> <tr><td> </td><td> </td></tr> <tr><td> </td><td> </td></tr> <tr><td> </td><td> </td></tr> </table> |                                                                                     |  |  |  |  |  |  |
|           |                                                                                  |                                                                                                                                                                                                       |                                                                                     |  |  |  |  |  |  |
|           |                                                                                  |                                                                                                                                                                                                       |                                                                                     |  |  |  |  |  |  |
|           |                                                                                  |                                                                                                                                                                                                       |                                                                                     |  |  |  |  |  |  |

Please place an "X" next to the following statement to indicate your agreement:

I certify that I have answered every question and have not altered the wording of any of the questions on this form.



### ICMJE DISCLOSURE FORM

**Date:** 3/27/2024

**Your Name:** Massimo Zuin

**Manuscript Title:** Non-ceruloplasmin copper and urinary copper in clinically stable Wilson Disease: Alignment with recommended targets and values in healthy persons

**Manuscript Number (if known):** JHEPR-D-23-01117

In the interest of transparency, we ask you to disclose all relationships/activities/interests listed below that are related to the content of your manuscript. "Related" means any relation with for-profit or not-for-profit third parties whose interests may be affected by the content of the manuscript. Disclosure represents a commitment to transparency and does not necessarily indicate a bias. If you are in doubt about whether to list a relationship/activity/interest, it is preferable that you do so.

The author's relationships/activities/interests should be defined broadly. For example, if your manuscript pertains to the epidemiology of hypertension, you should declare all relationships with manufacturers of antihypertensive medication, even if that medication is not mentioned in the manuscript.

In item #1 below, report all support for the work reported in this manuscript without time limit. For all other items, the time frame for disclosure is the past 36 months.

|                                                    | Name all entities with whom you have this relationship or indicate none (add rows as needed)                                                                                   | Specifications/Comments (e.g., if payments were made to you or to your institution)                                                                                                                                                                                                                                                                       |  |  |  |  |  |  |
|----------------------------------------------------|--------------------------------------------------------------------------------------------------------------------------------------------------------------------------------|-----------------------------------------------------------------------------------------------------------------------------------------------------------------------------------------------------------------------------------------------------------------------------------------------------------------------------------------------------------|--|--|--|--|--|--|
| Time frame: Since the initial planning of the work |                                                                                                                                                                                |                                                                                                                                                                                                                                                                                                                                                           |  |  |  |  |  |  |
| <b>1</b>                                           | All support for the present manuscript (e.g., funding, provision of study materials, medical writing, article processing charges, etc.)<br><b>No time limit for this item.</b> | <input checked="" type="checkbox"/> <b>None</b><br><table border="1" style="width: 100%; height: 40px; margin-top: 5px;"> <tr><td style="width: 60%;"></td><td></td></tr> <tr><td></td><td></td></tr> <tr><td></td><td></td></tr> </table> <p style="font-size: small; text-align: right; margin-top: 5px;">Click the tab key to add additional rows.</p> |  |  |  |  |  |  |
|                                                    |                                                                                                                                                                                |                                                                                                                                                                                                                                                                                                                                                           |  |  |  |  |  |  |
|                                                    |                                                                                                                                                                                |                                                                                                                                                                                                                                                                                                                                                           |  |  |  |  |  |  |
|                                                    |                                                                                                                                                                                |                                                                                                                                                                                                                                                                                                                                                           |  |  |  |  |  |  |
| Time frame: past 36 months                         |                                                                                                                                                                                |                                                                                                                                                                                                                                                                                                                                                           |  |  |  |  |  |  |
| <b>2</b>                                           | Grants or contracts from any entity (if not indicated in item #1 above).                                                                                                       | <input checked="" type="checkbox"/> <b>None</b><br><table border="1" style="width: 100%; height: 40px; margin-top: 5px;"> <tr><td style="width: 60%;"></td><td></td></tr> <tr><td></td><td></td></tr> <tr><td></td><td></td></tr> </table>                                                                                                                |  |  |  |  |  |  |
|                                                    |                                                                                                                                                                                |                                                                                                                                                                                                                                                                                                                                                           |  |  |  |  |  |  |
|                                                    |                                                                                                                                                                                |                                                                                                                                                                                                                                                                                                                                                           |  |  |  |  |  |  |
|                                                    |                                                                                                                                                                                |                                                                                                                                                                                                                                                                                                                                                           |  |  |  |  |  |  |
| <b>3</b>                                           | Royalties or licenses                                                                                                                                                          | <input checked="" type="checkbox"/> <b>None</b><br><table border="1" style="width: 100%; height: 40px; margin-top: 5px;"> <tr><td style="width: 60%;"></td><td></td></tr> <tr><td></td><td></td></tr> <tr><td></td><td></td></tr> </table>                                                                                                                |  |  |  |  |  |  |
|                                                    |                                                                                                                                                                                |                                                                                                                                                                                                                                                                                                                                                           |  |  |  |  |  |  |
|                                                    |                                                                                                                                                                                |                                                                                                                                                                                                                                                                                                                                                           |  |  |  |  |  |  |
|                                                    |                                                                                                                                                                                |                                                                                                                                                                                                                                                                                                                                                           |  |  |  |  |  |  |

|          |                                                                                                              | Name all entities with whom you have this relationship or indicate none (add rows as needed)                                                                           | Specifications/Comments (e.g., if payments were made to you or to your institution) |  |         |  |  |  |  |
|----------|--------------------------------------------------------------------------------------------------------------|------------------------------------------------------------------------------------------------------------------------------------------------------------------------|-------------------------------------------------------------------------------------|--|---------|--|--|--|--|
| 4        | Consulting fees                                                                                              | <input type="checkbox"/> <b>None</b><br><table border="1"> <tr><td>Orphalan</td><td></td></tr> <tr><td></td><td></td></tr> <tr><td></td><td></td></tr> </table>        | Orphalan                                                                            |  |         |  |  |  |  |
| Orphalan |                                                                                                              |                                                                                                                                                                        |                                                                                     |  |         |  |  |  |  |
|          |                                                                                                              |                                                                                                                                                                        |                                                                                     |  |         |  |  |  |  |
|          |                                                                                                              |                                                                                                                                                                        |                                                                                     |  |         |  |  |  |  |
| 5        | Payment or honoraria for lectures, presentations, speakers bureaus, manuscript writing or educational events | <input type="checkbox"/> <b>None</b><br><table border="1"> <tr><td>Orphalan</td><td></td></tr> <tr><td></td><td></td></tr> </table>                                    | Orphalan                                                                            |  |         |  |  |  |  |
| Orphalan |                                                                                                              |                                                                                                                                                                        |                                                                                     |  |         |  |  |  |  |
|          |                                                                                                              |                                                                                                                                                                        |                                                                                     |  |         |  |  |  |  |
| 6        | Payment for expert testimony                                                                                 | <input checked="" type="checkbox"/> <b>None</b><br><table border="1"> <tr><td></td><td></td></tr> <tr><td></td><td></td></tr> </table>                                 |                                                                                     |  |         |  |  |  |  |
|          |                                                                                                              |                                                                                                                                                                        |                                                                                     |  |         |  |  |  |  |
|          |                                                                                                              |                                                                                                                                                                        |                                                                                     |  |         |  |  |  |  |
| 7        | Support for attending meetings and/or travel                                                                 | <input type="checkbox"/> <b>None</b><br><table border="1"> <tr><td>Orphalan</td><td></td></tr> <tr><td></td><td></td></tr> </table>                                    | Orphalan                                                                            |  |         |  |  |  |  |
| Orphalan |                                                                                                              |                                                                                                                                                                        |                                                                                     |  |         |  |  |  |  |
|          |                                                                                                              |                                                                                                                                                                        |                                                                                     |  |         |  |  |  |  |
| 8        | Patents planned, issued or pending                                                                           | <input checked="" type="checkbox"/> <b>None</b><br><table border="1"> <tr><td></td><td></td></tr> <tr><td></td><td></td></tr> </table>                                 |                                                                                     |  |         |  |  |  |  |
|          |                                                                                                              |                                                                                                                                                                        |                                                                                     |  |         |  |  |  |  |
|          |                                                                                                              |                                                                                                                                                                        |                                                                                     |  |         |  |  |  |  |
| 9        | Participation on a Data Safety Monitoring Board or Advisory Board                                            | <input type="checkbox"/> <b>None</b><br><table border="1"> <tr><td>Orphalan</td><td></td></tr> <tr><td>Alexion</td><td></td></tr> <tr><td></td><td></td></tr> </table> | Orphalan                                                                            |  | Alexion |  |  |  |  |
| Orphalan |                                                                                                              |                                                                                                                                                                        |                                                                                     |  |         |  |  |  |  |
| Alexion  |                                                                                                              |                                                                                                                                                                        |                                                                                     |  |         |  |  |  |  |
|          |                                                                                                              |                                                                                                                                                                        |                                                                                     |  |         |  |  |  |  |
| 10       | Leadership or fiduciary role in other board, society, committee or advocacy group, paid or unpaid            | <input type="checkbox"/> <b>None</b><br><table border="1"> <tr><td></td><td></td></tr> <tr><td></td><td></td></tr> </table>                                            |                                                                                     |  |         |  |  |  |  |
|          |                                                                                                              |                                                                                                                                                                        |                                                                                     |  |         |  |  |  |  |
|          |                                                                                                              |                                                                                                                                                                        |                                                                                     |  |         |  |  |  |  |

|           |                                                                                  | Name all entities with whom you have this relationship or indicate none (add rows as needed) | Specifications/Comments (e.g., if payments were made to you or to your institution) |
|-----------|----------------------------------------------------------------------------------|----------------------------------------------------------------------------------------------|-------------------------------------------------------------------------------------|
| <b>11</b> | Stock or stock options                                                           | <input checked="" type="checkbox"/> <b>None</b>                                              |                                                                                     |
|           |                                                                                  |                                                                                              |                                                                                     |
|           |                                                                                  |                                                                                              |                                                                                     |
| <b>12</b> | Receipt of equipment, materials, drugs, medical writing, gifts or other services | <input checked="" type="checkbox"/> <b>None</b>                                              |                                                                                     |
|           |                                                                                  |                                                                                              |                                                                                     |
|           |                                                                                  |                                                                                              |                                                                                     |
| <b>13</b> | Other financial or non-financial interests                                       | <input checked="" type="checkbox"/> <b>None</b>                                              |                                                                                     |
|           |                                                                                  |                                                                                              |                                                                                     |
|           |                                                                                  |                                                                                              |                                                                                     |

Please place an "X" next to the following statement to indicate your agreement:

I certify that I have answered every question and have not altered the wording of any of the questions on this form.
